# Supplementary material for: Biological Function of Prophage-Related Gene Cluster ΔVpaChn25_RS25055~ΔVpaChn25_0714 of Vibrio parahaemolyticus CHN25
Source: MDPI journal article supplement (doi:10.3390/ijms25031393), 2024-01-23
Supplement: s1 [file s1]

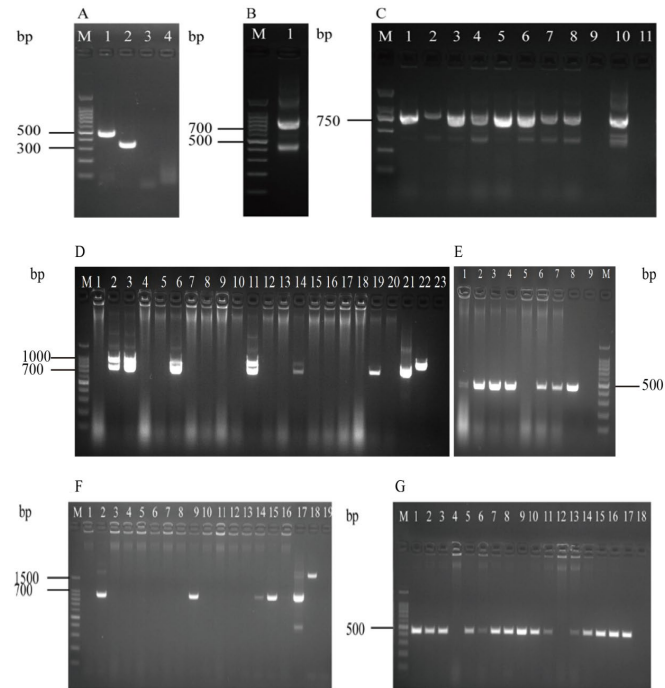

**Figure S1.** Construction of the  $\Delta VpaChn25\_0713$  mutant by agarose gel electrophoresis analysis.

(A) Amplicons of upstream and downstream of the *VpaChn25\_0713*. M, 100 bp DNA Ladder; Line 1, upstream of *VpaChn25\_0713*; Line 2, downstream of *VpaChn25\_0713*; Line 3–4, blank. (B) Amplicons of upstream& downstream of *VpaChn25\_0713*. M, 100 bp DNA Ladder. (C) Amplicons of upstream, downstream of *VpaChn25\_0713* in the recombinant plasmids. M, D2000 DNA Ladder. (D) Amplicons of *VpaChn25\_0713*-up-F and *VpaChn25\_0713*-down-R. M, 100 bp DNA Ladder. (E) Amplicons of *tlh*. M, 100 bp DNA Ladder. (F) Amplicons of *VpaChn25\_0713*-up-ex-F and *VpaChn25\_0713*-down-ex-R. M, 100 bp DNA Ladder. (G): Amplicons of *tlh*. M, 100 bp DNA Ladder.

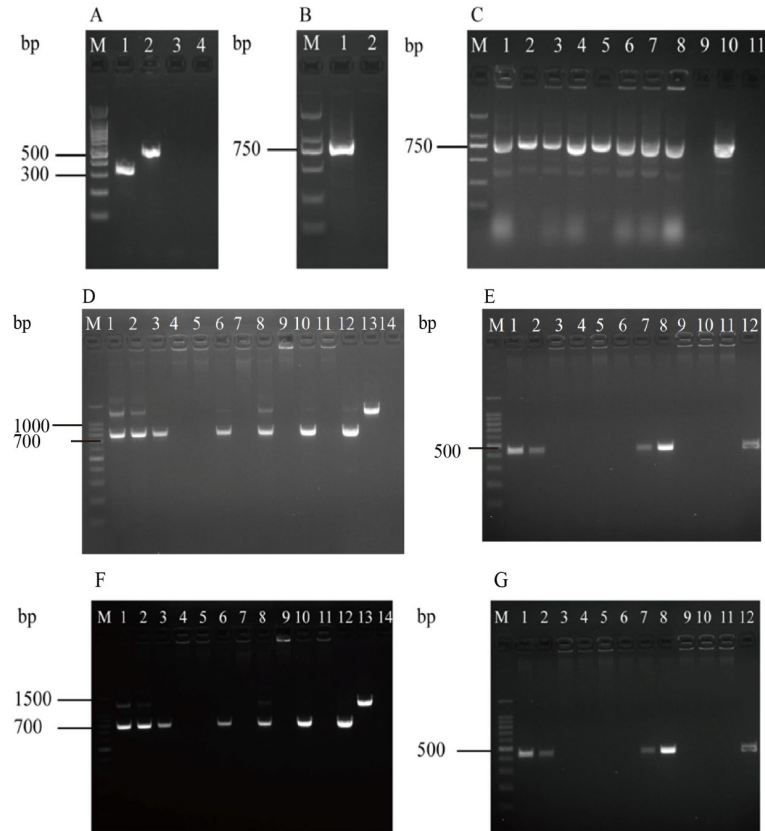

**Figure S2.** Construction of the  $\Delta VpaChn25\_0714$  mutant by agarose gel electrophoresis analysis.

(A) amplicons of upstream and downstream of *VpaChn25\_0714*. M, 100 bp DNA Ladder; Line 1, upstream of *VpaChn25\_0714*; Line 2, downstream of *VpaChn25\_0714*; Line 3–4, blank. (B) amplicons of upstream& downstream of *VpaChn25\_0714*. M, D2000 bp DNA Ladder. (C) amplicons of upstream& downstream of *VpaChn25\_0714* in the recombinant plasmids. M, D2000 bp DNA Ladder. (D) amplicons of *VpaChn25\_0714*-up-F and *VpaChn25\_0714*-down-R. M, 100 bp DNA Ladder. (E): Amplicons of *tlh*. M, 100 bp DNA Ladder. (F) Amplicons of *VpaChn25\_0714*-up-ex-F and *VpaChn25\_0714*-down-ex-R. M, 100 bp DNA Ladder. (G) Amplicons of *tlh*. M, 100 bp DNA Ladder.

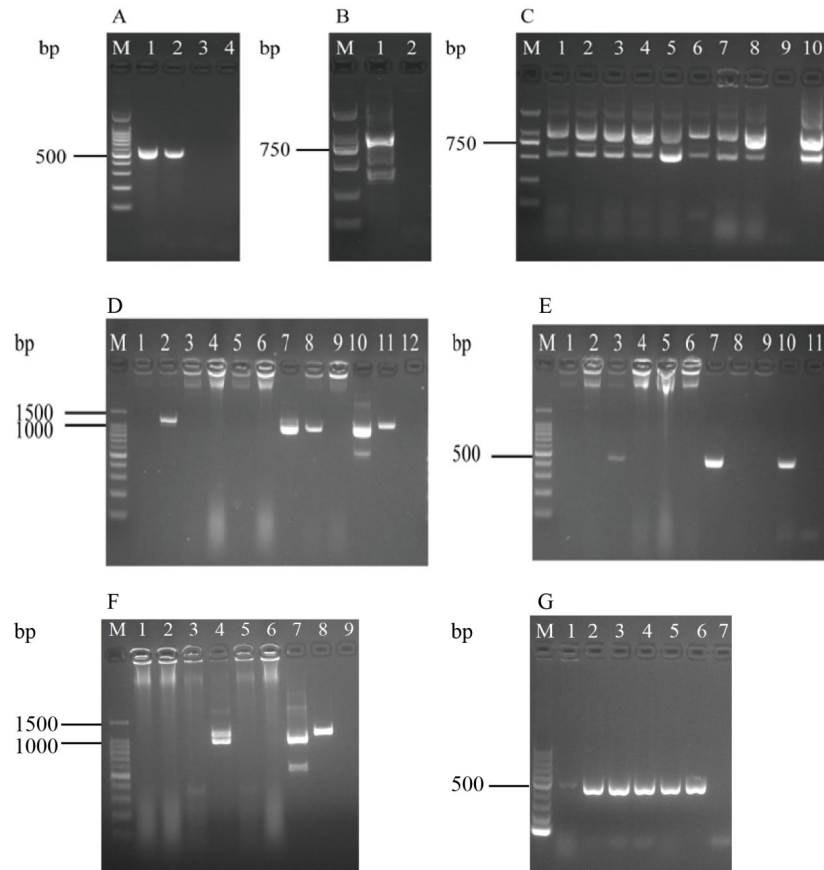

**Figure S3.** Construction of the  $\Delta VpaChn25\_RS25055$  mutant by agarose gel electrophoresis analysis.

(A) Amplicons of upstream and downstream of *VpaChn25\_RS25055*. M, 100 bp DNA Ladder; Line1, upstream of *VpaChn25\_RS25055*; Line2, downstream of *VpaChn25\_RS25055*; Line3–4, blank. (B) Amplicons of upstream& downstream of *VpaChn25\_RS25055*. M, D2000 bp DNA Ladder. (C) Amplicons of upstream& downstream of *VpaChn25\_RS25055* in the recombinant plasmids. M, D2000 bp DNA Ladder. (D) Amplicons of *VpaChn25\_RS25055*-up-F and *VpaChn25\_RS25055*-down-R. M, 100 bp DNA Ladder. (E) Amplicons of *tlh*. M, 100 bp DNA Ladder. (F) Amplicons of *VpaChn25\_RS25055*-up-ex-F and *VpaChn25\_RS25055*-down-ex-R. M, 100 bp DNA Ladder. (G) Amplicons of *tlh*. M, 100 bp DNA Ladder.

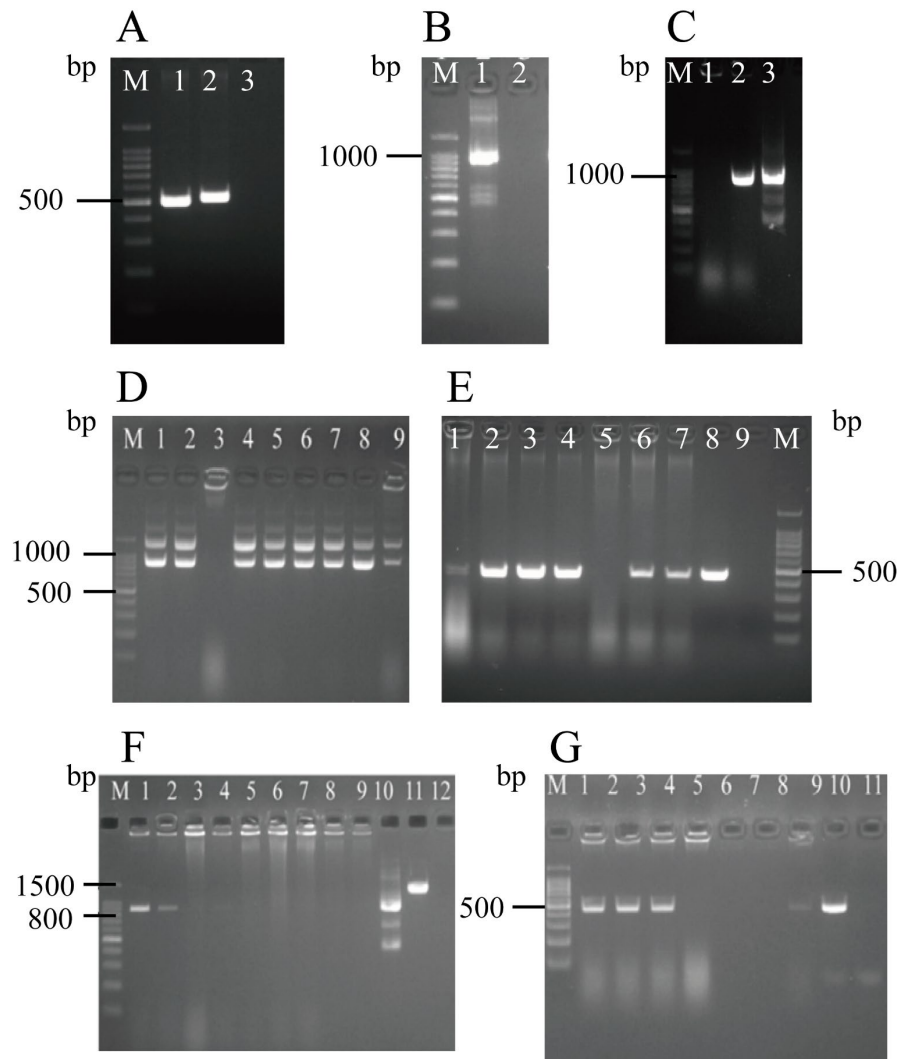

**Figure S4.** Construction of the  $\Delta VpaChn25\_RS25055-0713-0714$  mutant by agarose gel electrophoresis analysis.

(A) Amplicons of upstream and downstream of *VpaChn25\_RS25055-0713-0714*. M, 100 bp DNA Ladder; Line1, upstream of *VpaChn25\_RS25055-0713-08714*; Line2, downstream of *VpaChn25\_RS25055-0713-0714*; Line3, blank. (B) Amplicons of upstream& downstream of *VpaChn25\_RS25055-0713-0714*. M, 100 bp DNA Ladder. (C) Amplicons of upstream& downstream of *VpaChn25\_RS25055-0713-0714* in the recombinant plasmids. M, 100 bp DNA Ladder. (D) Amplicons of *VpaChn25\_RS25055-0713-0714*-up-F and *VpaChn25\_RS25055-0713-0714*-down-R. M, 100 bp DNA Ladder. (E) Amplicons of *tlh*. M, 100 bp DNA Ladder. (F) Amplicons of *VpaChn25\_RS25055-0713-0714*-up-ex-F and *VpaChn25\_RS25055-0713-0714*-down-ex-R. M, 100 bp DNA Ladder. (G) Amplicons of *tlh*. M, 100 bp DNA Ladder.



WT

*VpaChn25\_0713*  
(234 bp)

(234 bp)

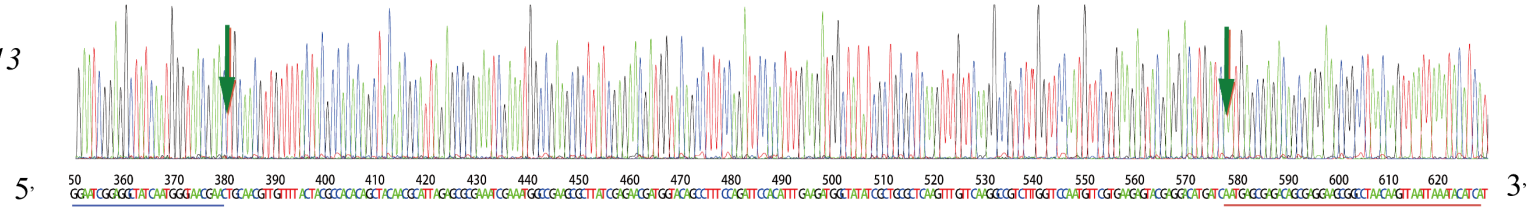 $\Delta V_{paChn25\_0713}$ 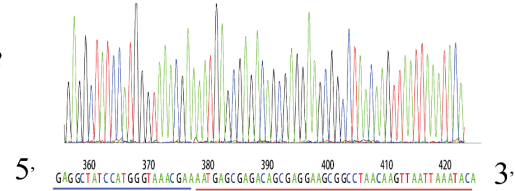

WT  
*VpaChn25\_0714*  
(480 bp)

*VpaChn25\_0714*

(480 bp)

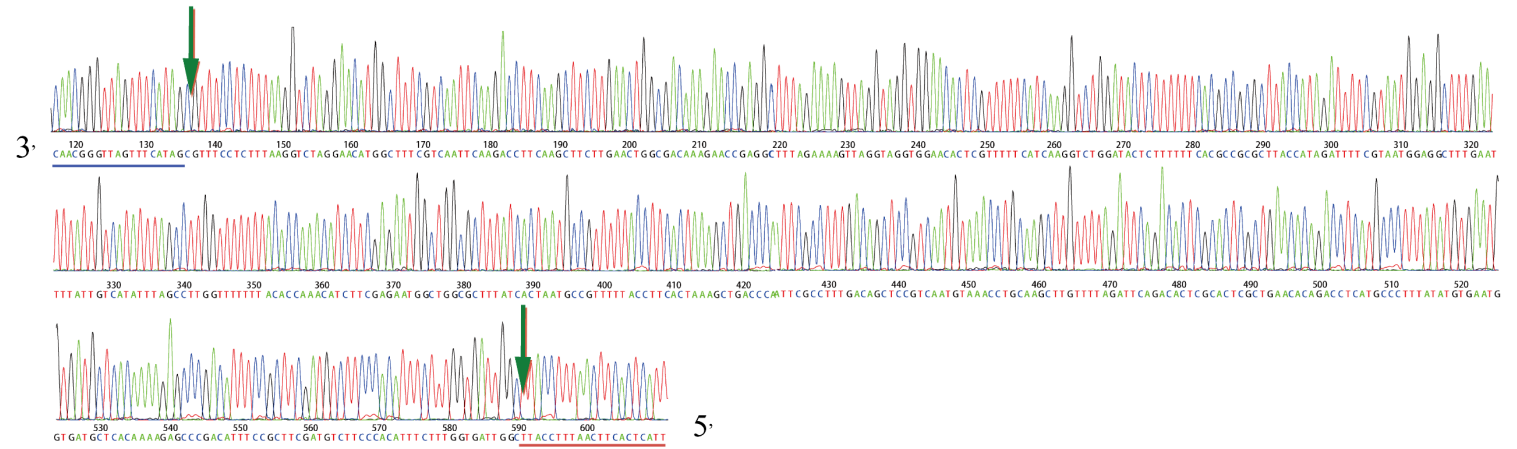 $\Delta V_{paChn25\_0714}$ 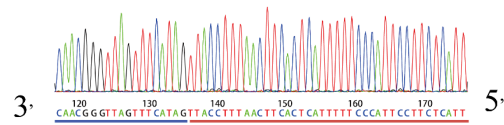

WT  
*VpaChn25\_RS25055*  
(186 bp)

*VpaChn25\_RS25055*

(186 bp)

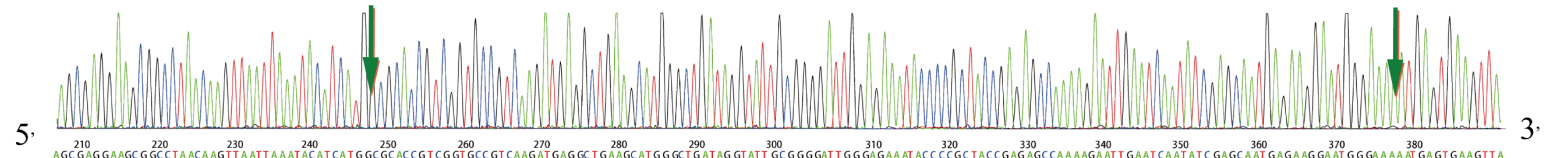 $\Delta V_{paChn25\_RS25055}$ 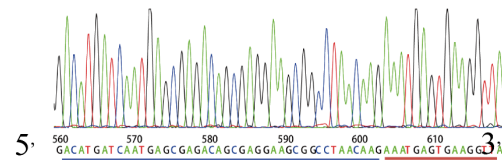

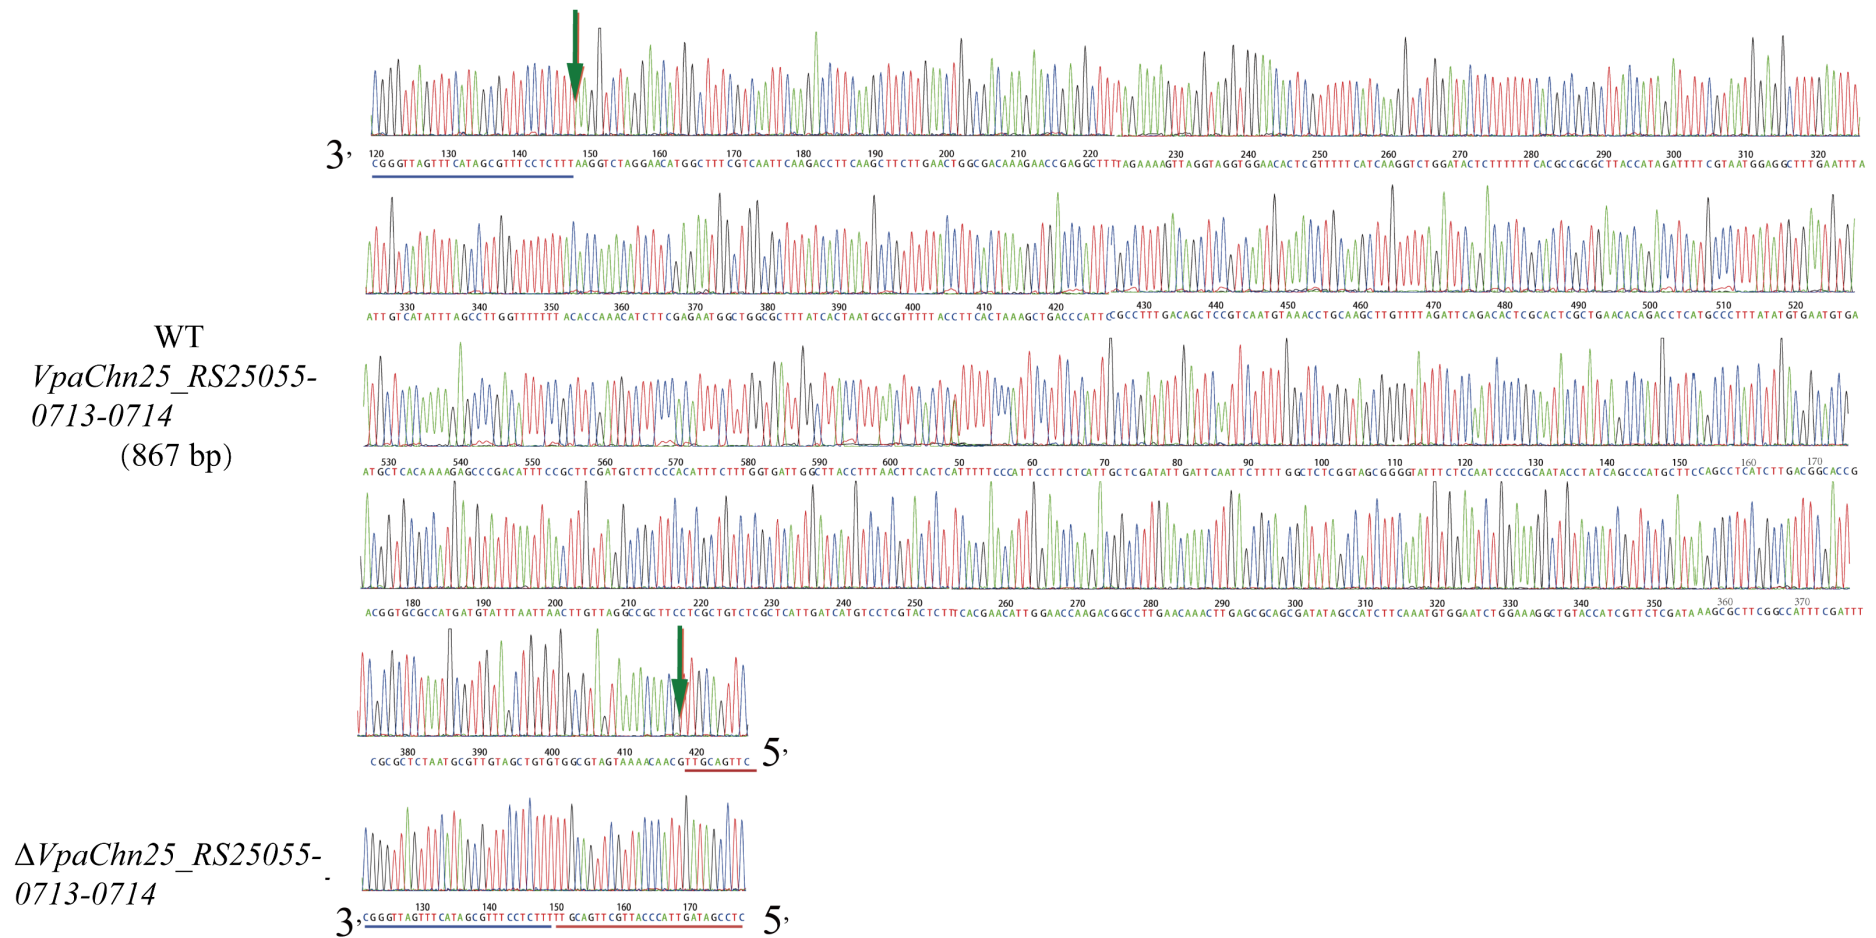

**Figure S5.** DNA sequencing chromatographs and schematic drawings of the *V. parahaemolyticus* CHN25 WT and  $\Delta VpaChn25_{0713}$ ,  $\Delta VpaChn25_{RS25055}$ ,  $\Delta VpaChn25_{0714}$ , and  $\Delta VpaChn25_{RS25055-0713-0714}$  mutants, respectively. The sequence between the two arrows represents the corresponding prophage gene base sequence

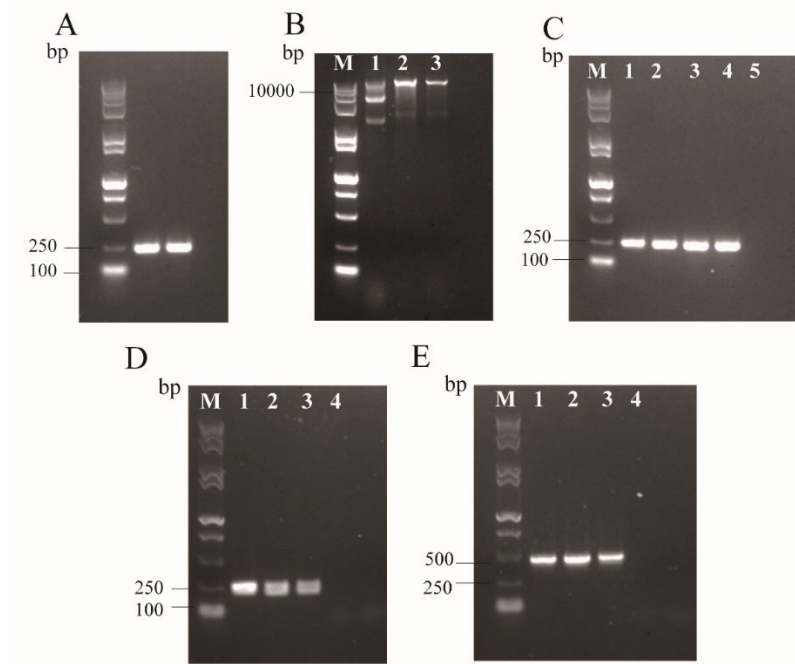

**Figure S6.** Construction of the  $\Delta VpaChn25\_0713$ -com by agarose gel electrophoresis analysis.

(A) Amplicons of the *VpaChn25\_0713* gene. M, D15000+2000 Ladder; Lines 1–2, positive bands; Line 3, blank control. (B) High-level expression vector pMMB207 plasmid DNA and its double digestion results. M, D15000+2000 Ladder. (C) Double digestion of the recombinant pMMB207+*VpaChn25\_0713* plasmid. M, D15000+2000 Ladder. (D) Amplicons of *VpaChn25\_0713* from positive transformants. M, D15000+2000 Ladder. (E) Amplicons of *tllh* from  $\Delta VpaChn25\_0713$ -com mutants. M, D15000+2000 Ladder.

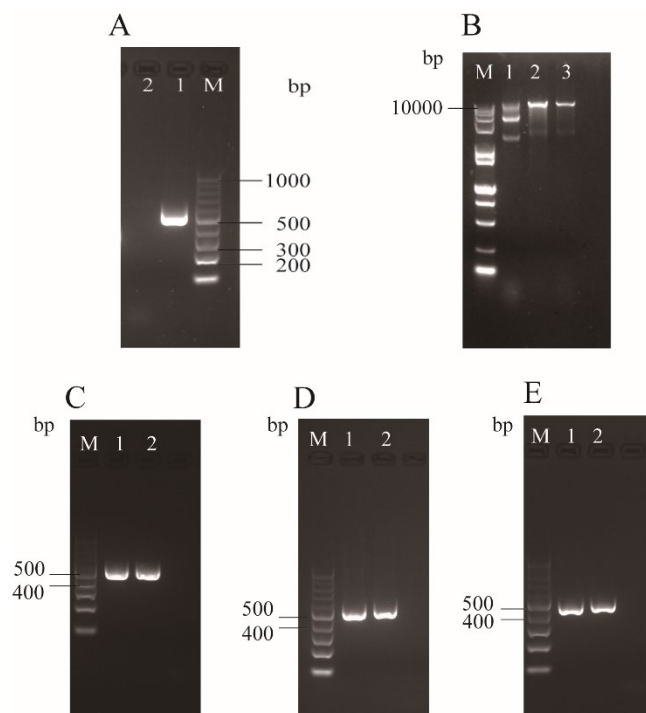

**Figure S7.** Construction of the  $\Delta VpaChn25\_0714$ -com by agarose gel electrophoresis analysis.

(A) Amplicons of the *VpaChn25\_0714* gene. M, 100 bp DNA Ladder; Lines 1, positive bands; Line 2, blank control. (B) High level expression vector pMMB207 plasmid DNA and its double digestion results. M, D15000+2000 Ladder. (C) Double digestion of the recombinant pMMB207+*VpaChn25\_0714* plasmid. M, 100 bp DNA Ladder. (D) Amplicons of *VpaChn25\_0714* from positive transformants. M, 100 bp DNA Ladder. (E) Amplicons of *tlh* from  $\Delta VpaChn25\_0714$ -com mutants. M, 100 bp DNA Ladder.

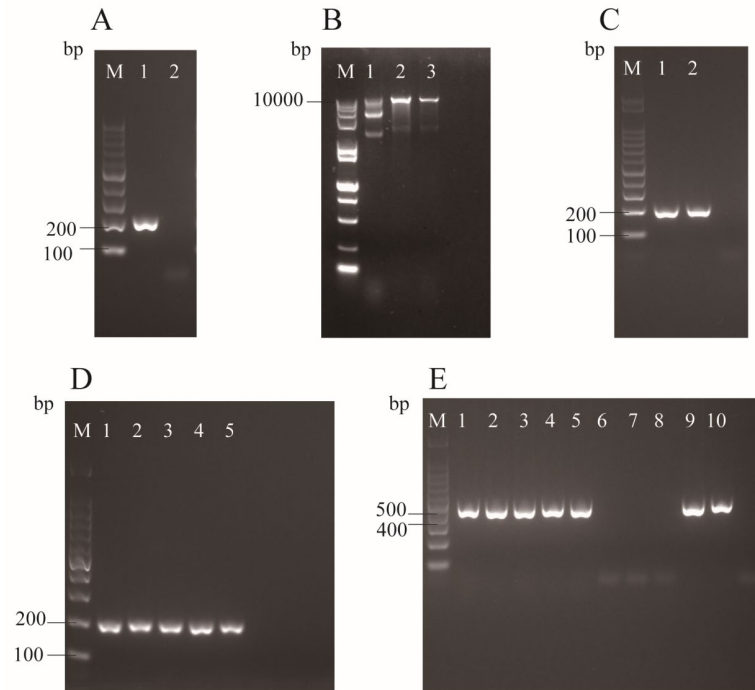

**Figure S8.** Construction of the  $\Delta VpaChn25\_RS25055$ -com by agarose gel electrophoresis analysis.

(A) Amplicons of the *VpaChn25\_RS25055* gene. M, 100 bp DNA Ladder; Lines 1, positive bands; Line 2, blank control. (B) High level expression vector pMMB207 plasmid DNA and its double digestion results. M, D15000+2000 Ladder. (C) Double digestion of the recombinant pMMB207+*VpaChn25\_RS25055* plasmid. M, 100 bp DNA Ladder. (D) Amplicons of *VpaChn25\_RS25055* from positive transformants. M, 100 bp DNA Ladder. (E) Amplicons of *tlh* from  $\Delta VpaChn25\_RS25055$ -com mutants. M, 100 bp DNA Ladder.

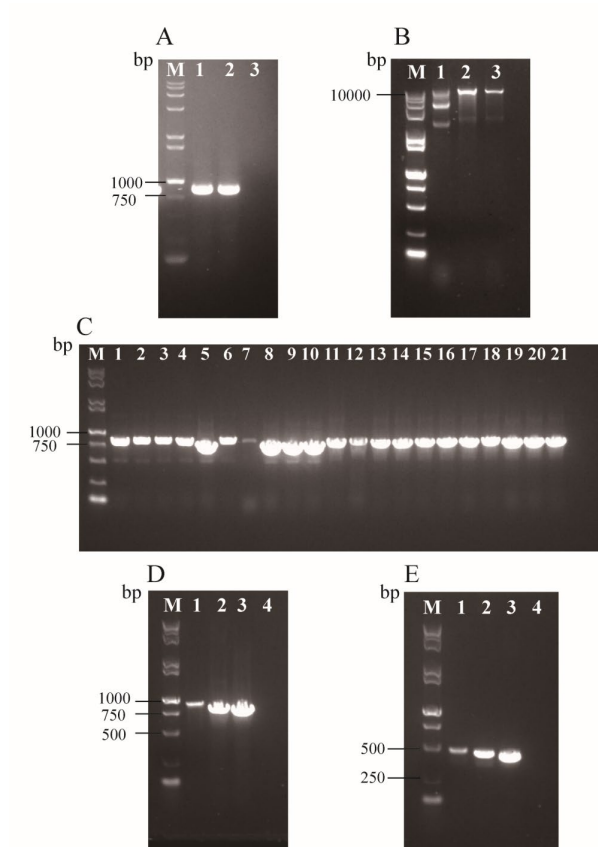

**Figure S9.** Construction of the  $\Delta VpaChn25\_RS25055-0713-0714$ -com by agarose gel electrophoresis analysis.

(A) Amplicons of the *VpaChn25\_RS25055-0713-0714* gene. M, D15000+2000 Ladder; Lines 1, positive bands; Line 2, blank control. (B) High level expression vector pMMB207 plasmid DNA and its double digestion results. M, D15000+2000 Ladder. (C) Double digestion of the recombinant pMMB207+*VpaChn25\_RS25055-0713-0714* plasmid. M, D15000+2000 Ladder. (D) Amplicons of *VpaChn25\_RS25055-0713-0714* from positive transformants. M, D15000+2000 Ladder. (E) Amplicons of *tlh* from  $\Delta VpaChn25\_RS25055-0713-0714$ -com mutants. M, D15000+2000 Ladder

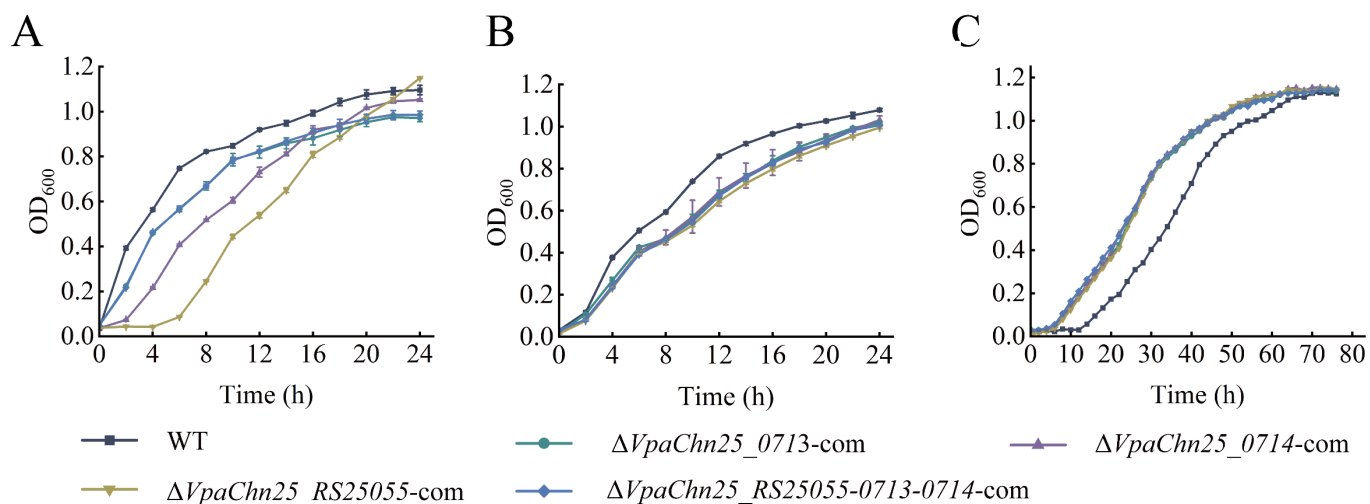

**Figure S10.** Survival of the *V. parahaemolyticus* CHN25 (WT),  $\Delta VpaChn25\_RS25055-com$ ,  $\Delta VpaChn25\_0713-com$ ,  $\Delta VpaChn25\_0714-com$ , and  $\Delta VpaChn25\_RS25055-0713-0714-com$  strains at different temperatures. The strains were individually incubated in the TSB medium (pH 8.5, 3% NaCl) at 37 °C (A), 25 °C (B), and 15 °C (C), respectively.

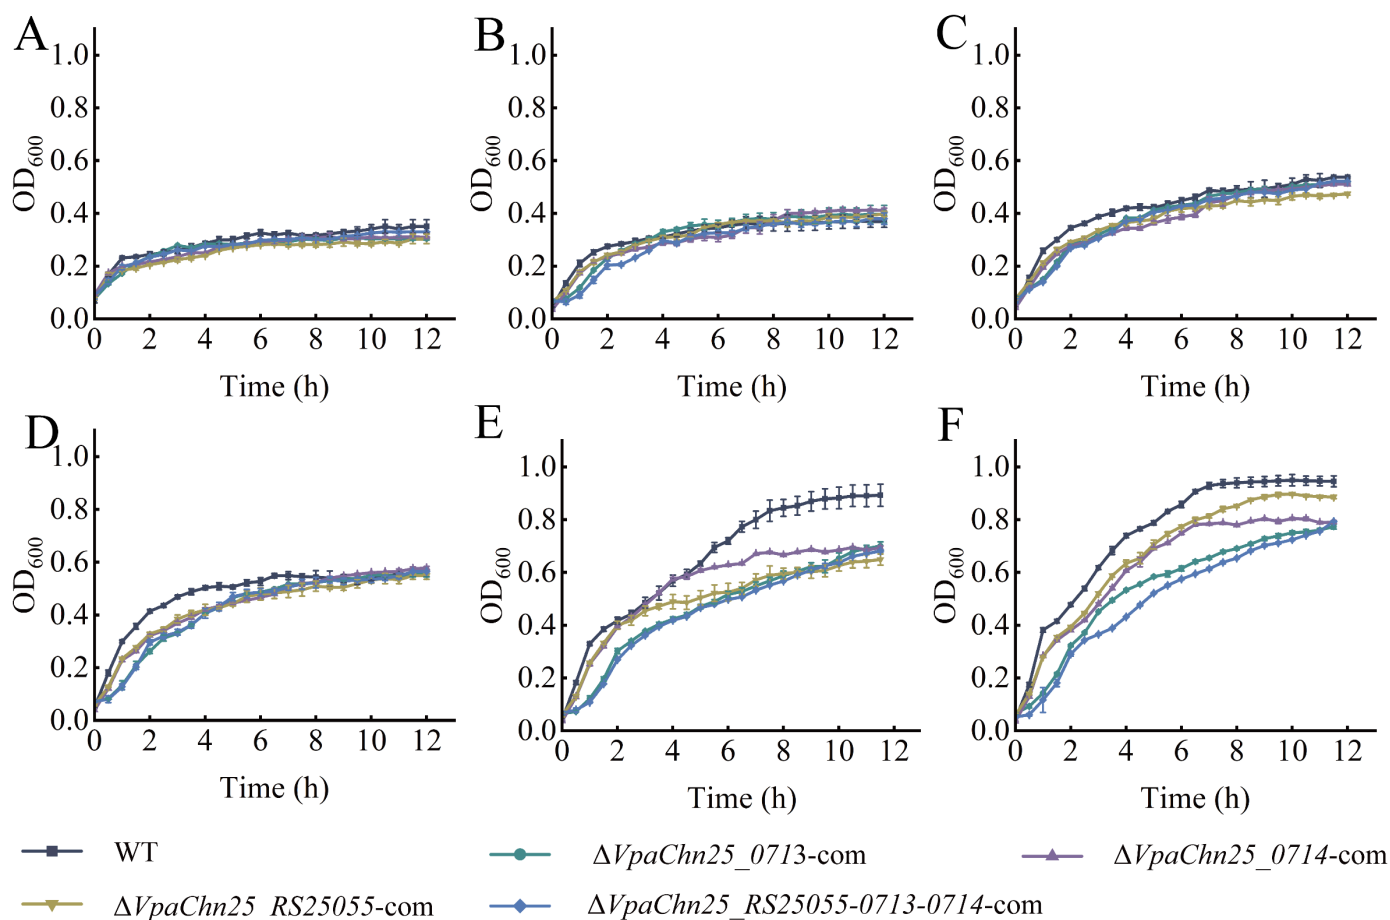

**Figure S11.** Survival of the *V. parahaemolyticus* CHN25 WT,  $\Delta VpaChn25\_RS25055-com$ ,  $\Delta VpaChn25\_0713-com$ ,  $\Delta VpaChn25\_0714-com$ ,  $\Delta VpaChn25\_RS25055-0713-0714-com$  strains at different pH conditions. The strains were individually incubated in the TSB medium (pH 8.5, 3% NaCl) at pH 5.5 (A), pH 6.0 (B), pH 6.5 (C), pH 7.0 (D), pH 7.5 (E), and pH 8.0 (F), respectively.

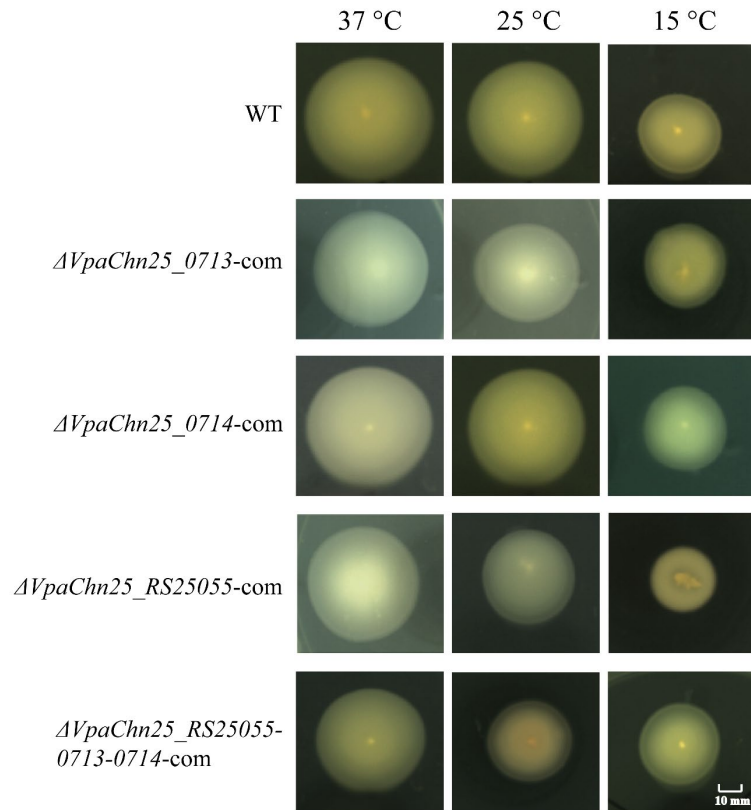

**Figure S12** Swimming motility of the *V. parahaemolyticus* CHN25 WT, *ΔVpaChn25\_RS25055-com*, *ΔVpaChn25\_0713-com*, *ΔVpaChn25\_0714-com*, *ΔVpaChn25\_RS25055-0713-0714-com* strains at different temperatures. The strains were individually incubated in a semi-solid TSB medium containing 0.25% agar at 37 °C, 25 °C, and 15 °C, respectively.



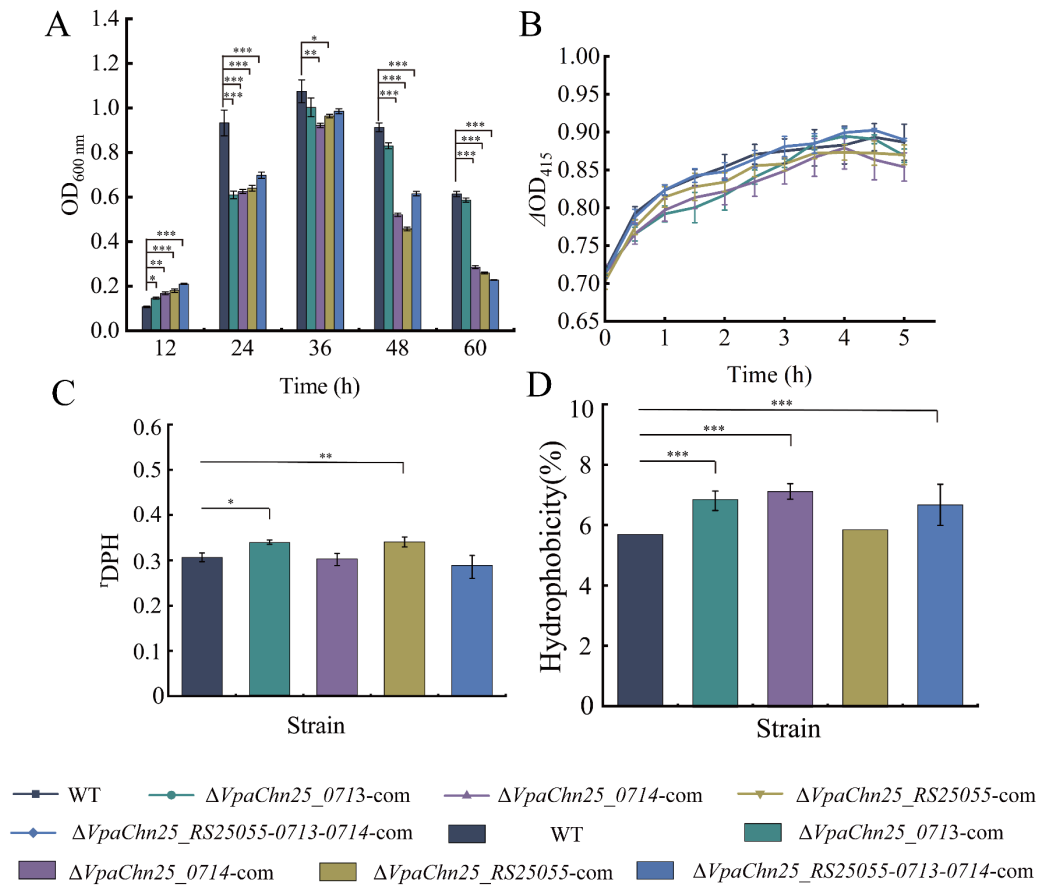

**Figure S13.** Biofilm formation (A), internal membrane permeability (B), fluidity (C), and hydrophobicity (D) of the *V. parahaemolyticus* CHN25 (WT),  $\Delta VpaChn25\_RS25055$ -com,  $\Delta VpaChn25\_0713$ -com,  $\Delta VpaChn25\_0714$ -com,  $\Delta VpaChn25\_RS25055$ -0713-0714-com strains. DPH: 1, 6-diphenyl-1,3,5-hexatriene. \* $p < 0.05$ , \*\* $p < 0.01$ , \*\*\* $p < 0.001$ .

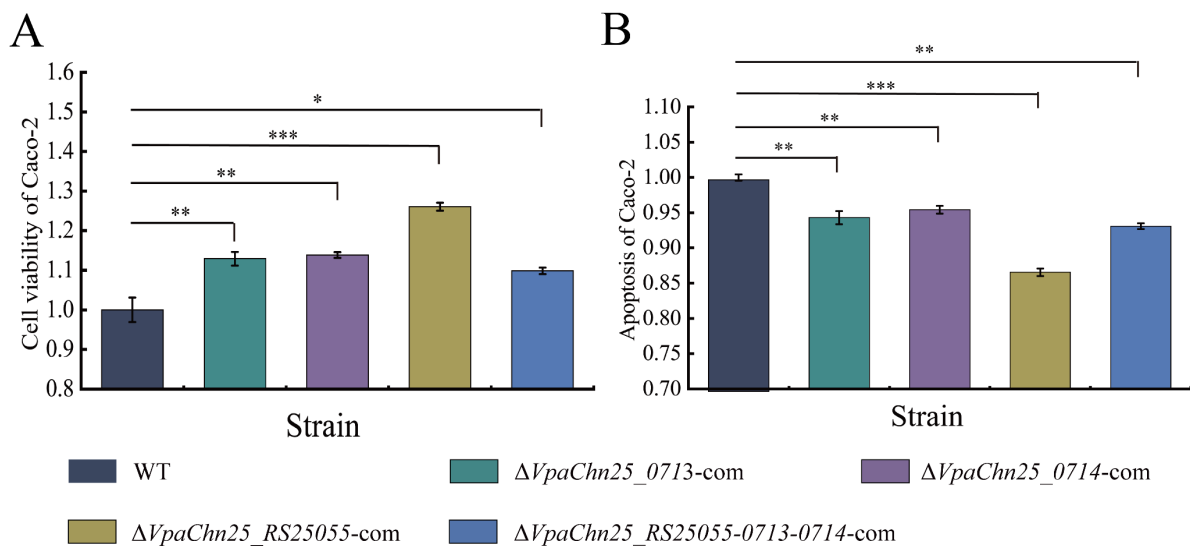

**Figure S14.** The viability and apoptosis of Caco-2 cells infected by the *V. parahaemolyticus* CHN25 WT,  $\Delta VpaChn25\_RS25055$ -com,  $\Delta VpaChn25\_0713$ -com,  $\Delta VpaChn25\_0714$ -com, and  $\Delta VpaChn25\_RS25055$ -0713-0714-com strains. The infection was performed at 37 °C for 4 h. (A) Cell viability; (B) cell apoptosis. \* $p < 0.05$ , \*\* $p < 0.01$ , \*\*\* $p < 0.001$ .



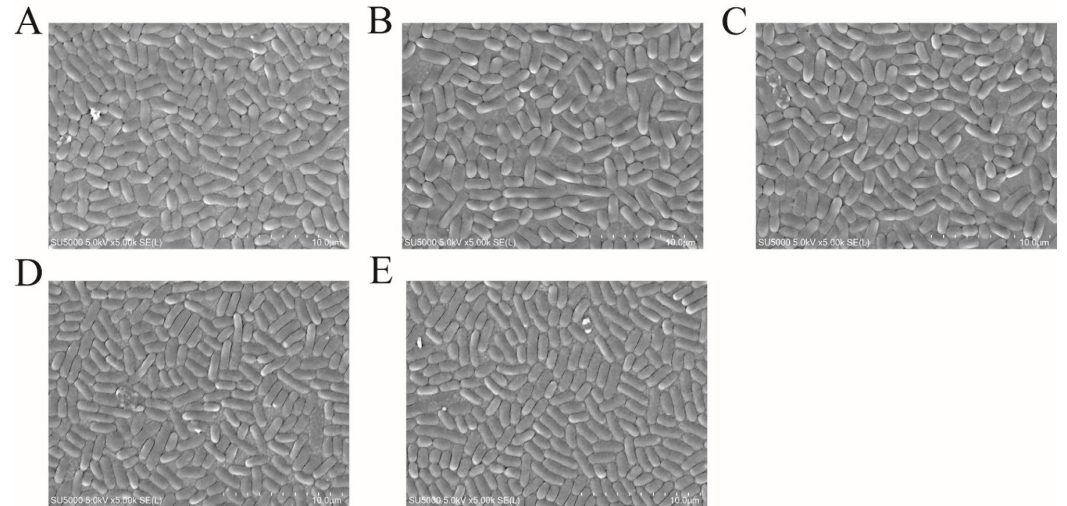

**Figure S15.** The SEM observation of cell structure of the *V. parahaemolyticus* CHN25 (WT),  $\Delta VpaChn25\_RS25055$ -com,  $\Delta VpaChn25\_0713$ -com,  $\Delta VpaChn25\_0714$ -com, and  $\Delta VpaChn25\_RS25055$ -0713-0714-com strains. (A) WT; (B)  $\Delta VpaChn25\_0713$ -com; (C)  $\Delta VpaChn25\_0714$ -com; (D)  $\Delta VpaChn25\_RS25055$ -com; (E)  $\Delta VpaChn25\_RS25055$ -0713-0714-com.

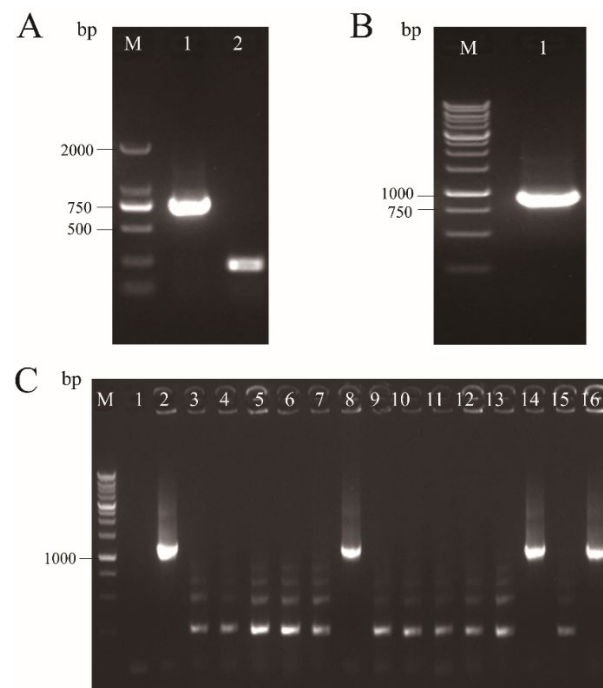

**Figure S16.** Construction of the  $\Delta VpaChn25\_RS25055$  (pMMB207+*VpaChn25\_RS25055*-sfGFP) by agarose gel electrophoresis analysis.

(A) Amplicons of the *VpaChn25\_RS25055* and sfGFP genes. M, 2000 bp DNA Ladder; Lines 1, sfGFP; Line 2, *VpaChn25\_RS25055*. (B) PCR fusion product of *VpaChn25\_RS25055* and sfGFP genes. M, DL 1000 bp DNA Ladder. (C) Ligation of the high expression vector pMMB207 and *VpaChn25\_RS25055*+sfGFP. M, DL 1000 bp DNA Ladder; Line 1–15, amplification results of clones 1–15.

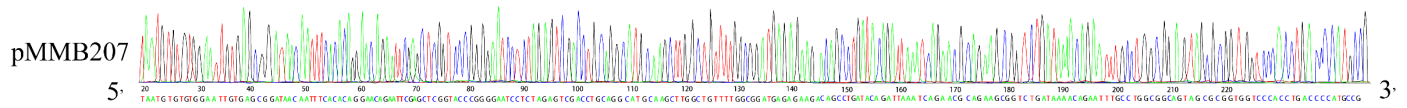

**Figure S17.** DNA sequencing chromatographs and schematic drawings of  $\Delta VpaChn25\_RS25055$  (pMMB207)

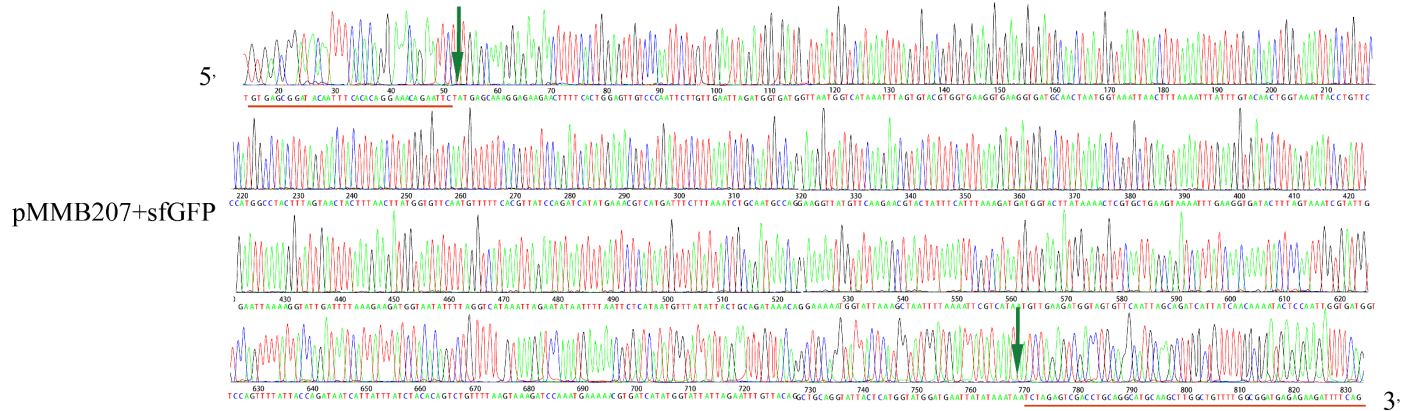

**Figure S18.** DNA sequencing chromatographs and schematic drawings of  $\Delta VpaChn25\_RS25055$  (pMMB207+ sfGFP). The sequence between the two green arrows represents sfGFP.

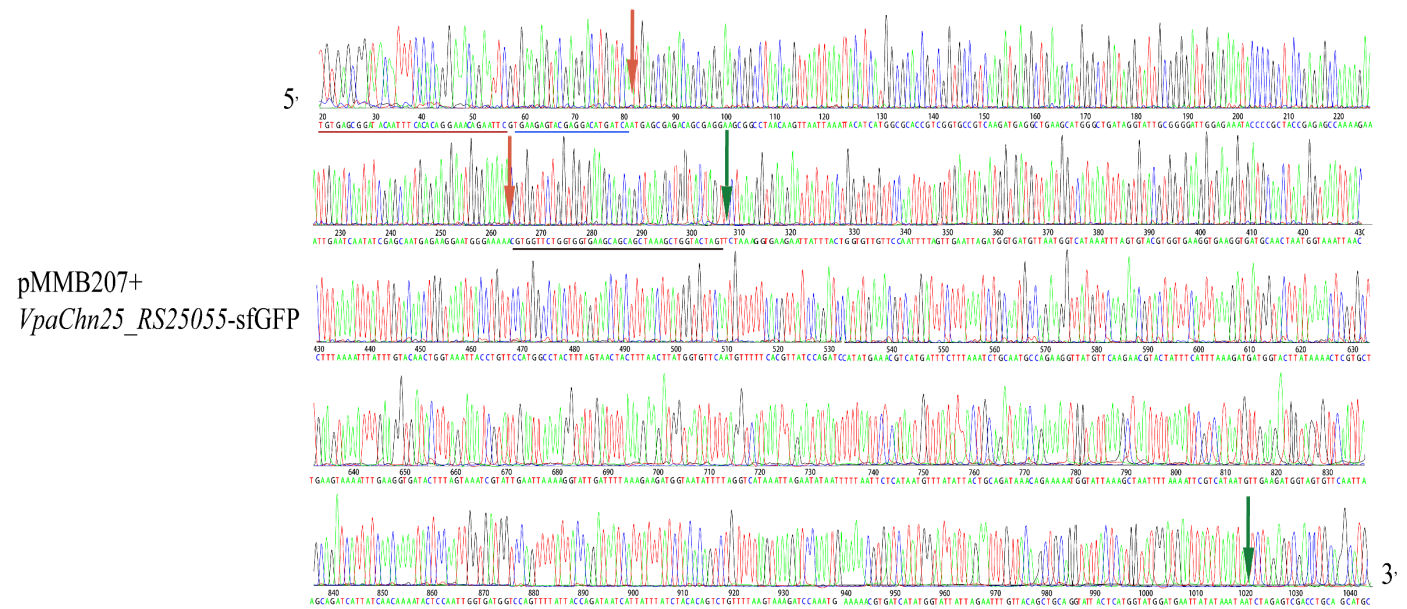

**Figure S19.** DNA sequencing chromatographs and schematic drawings of  $\Delta VpaChn25\_RS25055$  (pMMB207+*VpaChn25\_RS25055*-sfGFP). The sequence between two red arrows represents *VpaChn25\_RS25055* and the sequence between two green arrows represents sfGFP.

**Table S1.** Oligonucleotide primers used in RT-PCR assay

|                                     | Primer             | Sequence(5'-3')           | Product size (bp) |
|-------------------------------------|--------------------|---------------------------|-------------------|
| $\Delta$ VpaChn25_0713              | VpaChn25_RS05195-F | GCACTAAACGCAATCCACT       | 283               |
|                                     | VpaChn25_RS05195-R | TGCCCATAAATACAGAAACA      |                   |
|                                     | VpaChn25_RS11110-F | AACCTAGAAAGGCCGAATG       | 229               |
|                                     | VpaChn25_RS11110-R | CACGAAATCCAAGACTGCT       |                   |
|                                     | VpaChn25_RS23525-F | CCAGCAGACTTCACATTCCG      | 196               |
|                                     | VpaChn25_RS23525-R | TGATGTTGCCTGTTTGGTC       |                   |
|                                     | VpaChn25_RS22165-F | ACAGTGGCTCACCCAGACG       | 232               |
|                                     | VpaChn25_RS22165-R | GGGACTCAACCGCAACAGG       |                   |
|                                     | VpaChn25_RS21450-F | AATCAAGCGAAATCAAAGAG      | 201               |
|                                     | VpaChn25_RS21450-R | AAGCGTTAAGCATCCACAT       |                   |
|                                     | VpaChn25_RS23335-F | GTGGTATGGACGGAAGCAA       | 243               |
|                                     | VpaChn25_RS23335-R | GAACCCAAGCGAAAGAAAC       |                   |
| $\Delta$ VpaChn25_0714              | VpaChn25_RS10475-F | TACTTCCGTCGTGGTAGCC       | 210               |
|                                     | VpaChn25_RS10475-R | CATTTGAGCCGCACCTTTT       |                   |
|                                     | VpaChn25_RS15965-F | CGCCAACGGAGTTCGGTAA       | 182               |
|                                     | VpaChn25_RS15965-R | CGCCAGCATCGCAATCTTT       |                   |
|                                     | VpaChn25_RS05195-F | GCACTAAACGCAATCCACT       | 283               |
|                                     | VpaChn25_RS05195-R | TGCCCATAAATACAGAAACA      |                   |
|                                     | VpaChn25_RS11110-F | AACCTAGAAAGGCCGAATG       | 229               |
|                                     | VpaChn25_RS11110-R | CACGAAATCCAAGACTGCT       |                   |
|                                     | VpaChn25_RS10585-F | CGTATCGGTCGTTTCGTAT       | 226               |
|                                     | VpaChn25_RS10585-R | CGTCCCATTAAAGGTCAGC       |                   |
|                                     | VpaChn25_RS00065-F | CCCAAAGAGTCAGAGTTATT      | 122               |
|                                     | VpaChn25_RS00065-R | CAACCGTCAAGCCAGTAAG       |                   |
| $\Delta$ VpaChn25_RS25055           | VpaChn25_RS02420-F | AACGACGAACTACTAAACTC      | 256               |
|                                     | VpaChn25_RS02420-R | TAACCAGAAACACGGATTG       |                   |
|                                     | VpaChn25_RS00565-F | CTTCTATCCGTATCCCAGTG      | 119               |
|                                     | VpaChn25_RS00565-R | GTCAAGACCAGCCATCAGT       |                   |
|                                     | VpaChn25_RS18370-F | TCAACATGATGGGAACTGG       | 106               |
|                                     | VpaChn25_RS18370-R | TAGCGTCTGCTGATAGTAGGA     |                   |
|                                     | VpaChn25_RS11110-F | AACCTAGAAAGGCCGAATG       | 229               |
|                                     | VpaChn25_RS11110-R | CACGAAATCCAAGACTGCT       |                   |
|                                     | VpaChn25_RS05045-F | GCCTACACTTCGCTCCAAT       | 178               |
|                                     | VpaChn25_RS05045-R | CGCTTCACAACACGACCAG       |                   |
|                                     | VpaChn25_RS11070-F | AGCGTTTGTCTTCGGGTTA       | 295               |
|                                     | VpaChn25_RS11070-R | TCAGCGATACGGTTTAGTT       |                   |
| $\Delta$ VpaChn25_RS25055-0713-0714 | VpaChn25_RS01880-F | GAATCGCAAACGGATACAG       | 207               |
|                                     | VpaChn25_RS01880-R | CACCAAAACCGATCACGATTGGGCT |                   |
|                                     | VpaChn25_RS01875-F | CATCCCTACGGAAGTTATT       | 125               |
|                                     | VpaChn25_RS01875-R | TGCTACCGCTGTCTATCAC       |                   |
|                                     | VpaChn25_RS05195-F | GCACTAAACGCAATCCACT       | 283               |
|                                     | VpaChn25_RS05195-R | TGCCCATAAATACAGAAACA      |                   |

|                            |                      |     |
|----------------------------|----------------------|-----|
| <i>VpaChn25_RS11110</i> -F | AACCTAGAAAGGCCGAATG  | 229 |
| <i>VpaChn25_RS11110</i> -R | CACGAAATCCAAGACTGCT  |     |
| <i>VpaChn25_RS16665</i> -F | GTTACTGTAGATGCGAAAGG | 121 |
| <i>VpaChn25_RS16665</i> -R | CAACAACAAGACGACCAAG  |     |
| <i>VpaChn25_RS22165</i> -F | ACAGTGGCTCACCCAGACG  | 232 |
| <i>VpaChn25_RS22165</i> -R | GGGACTCAACCGCAACAGG  |     |

**Table S2.** Expression of representative DEGs in  $\Delta VpaChn25\_0713$ ,  $\Delta VpaChn25\_0714$ ,  $\Delta VpaChn25\_RS25055$ , and  $\Delta VpaChn25\_RS25055$ -0713-0714 mutants by the RT-PCR assay.

| strain                                    | Gene                    | Predicted protein                                                      | Fold change |        |
|-------------------------------------------|-------------------------|------------------------------------------------------------------------|-------------|--------|
|                                           |                         |                                                                        | RNA-Seq.    | RT-PCR |
| $\Delta VpaChn25\_0713$                   | <i>VpaChn25_RS05195</i> | formate C-acetyltransferase                                            | 0.162       | 0.306  |
|                                           | <i>VpaChn25_RS11110</i> | helix-turn-helix domain-containing protein                             | 0.194       | 0.113  |
|                                           | <i>VpaChn25_RS23525</i> | alkyl hydroperoxide reductase subunit C                                | 0.262       | 0.475  |
|                                           | <i>VpaChn25_RS22165</i> | maltose/maltodextrin ABC transporter                                   | 4.423       | 2.156  |
|                                           | <i>VpaChn25_RS21450</i> | DNA starvation/stationary phase protection                             | 0.412       | 0.578  |
|                                           | <i>VpaChn25_RS23335</i> | maltoporin                                                             | 3.497       | 2.986  |
| $\Delta VpaChn25\_0714$                   | <i>VpaChn25_RS10475</i> | bifunctional acetaldehyde-CoA/alcohol dehydrogenase                    | 0.396       | 0.478  |
|                                           | <i>VpaChn25_RS15965</i> | DUF3081 domain-containing protein                                      | 2.462       | 3.579  |
|                                           | <i>VpaChn25_RS05195</i> | formate C-acetyltransferase                                            | 0.172       | 0.223  |
|                                           | <i>VpaChn25_RS11110</i> | helix-turn-helix domain-containing protein                             | 0.246       | 0.378  |
|                                           | <i>VpaChn25_RS10585</i> | type I glyceraldehyde-3-phosphate dehydrogenase                        | 0.285       | 0.872  |
|                                           | <i>VpaChn25_RS00065</i> | hypothetical protein                                                   | 2.679       | 1.689  |
| $\Delta VpaChn25\_RS25055$                | <i>VpaChn25_RS02420</i> | autonomous glycyl radical cofactor GrcA                                | 0.444       | 0.372  |
|                                           | <i>VpaChn25_RS00565</i> | glutamate--ammonia ligase                                              | 6.026       | 4.358  |
|                                           | <i>VpaChn25_RS18370</i> | hypothetical protein                                                   | 2.786       | 2.323  |
|                                           | <i>VpaChn25_RS11110</i> | helix-turn-helix domain-containing protein                             | 0.188       | 0.372  |
|                                           | <i>VpaChn25_RS05045</i> | uridine phosphorylase                                                  | 0.317       | 0.742  |
|                                           | <i>VpaChn25_RS11070</i> | flagellin                                                              | 0.396       | 0.562  |
| $\Delta VpaChn25\_RS25055$ -<br>0713-0714 | <i>VpaChn25_RS01880</i> | glutamine-fructose-6-phosphate transaminase (isomerizing)              | 0.237       | 0.676  |
|                                           | <i>VpaChn25_RS01875</i> | DeoR family transcriptional regulator                                  | 0.237       | 0.242  |
|                                           | <i>VpaChn25_RS05195</i> | formate C-acetyltransferase                                            | 0.055       | 0.469  |
|                                           | <i>VpaChn25_RS11110</i> | helix-turn-helix domain-containing protein                             | 0.129       | 0.187  |
|                                           | <i>VpaChn25_RS16665</i> | porin                                                                  | 3.477       | 4.552  |
|                                           | <i>VpaChn25_RS22165</i> | maltose/maltodextrin ABC transporter substrate-binding protein<br>MalE | 7.184       | 8.135  |

**Table S3.** Major changed metabolic pathways in the  $\Delta VpaChn25\_0713$  mutant.

| Metabolism Pathway        | Gene ID                 | Fold Change | Gene Description                                       |
|---------------------------|-------------------------|-------------|--------------------------------------------------------|
| Phosphotransferase system | <i>VpaChn25_RS19520</i> | 0.057       | PTS fructose transporter subunit IIBC                  |
|                           | <i>VpaChn25_RS19525</i> | 0.080       | 1-phosphofructokinase                                  |
|                           | <i>VpaChn25_RS19530</i> | 0.136       | Fused PTS fructose transporter subunit IIA/HPr protein |
|                           | <i>VpaChn25_RS16970</i> | 0.173       | PTS sugar transporter subunit IIB                      |
|                           | <i>VpaChn25_RS21735</i> | 0.180       | PTS sugar transporter subunit IIA                      |

|                                  |                         |       |                                                              |
|----------------------------------|-------------------------|-------|--------------------------------------------------------------|
|                                  | <i>VpaChn25_RS01935</i> | 0.357 | PTS mannitol transporter subunit IICBA                       |
|                                  | <i>VpaChn25_RS13465</i> | 0.370 | PTS lactose/cellobiose transporter subunit IIA               |
|                                  | <i>VpaChn25_RS21730</i> | 0.451 | PTS mannitol transporter subunit IICB                        |
|                                  | <i>VpaChn25_RS16965</i> | 0.491 | PTS ascorbate transporter subunit IIC                        |
|                                  | <i>VpaChn25_RS13470</i> | 2.022 | PTS sugar transporter subunit IIC                            |
|                                  | <i>VpaChn25_RS01915</i> | 2.370 | Phosphoenolpyruvate-protein phosphotransferase               |
|                                  | <i>VpaChn25_RS23450</i> | 4.023 | Glucose-specific PTS transporter subunit IIBC                |
| Glycolysis/Gluconeogenesis       | <i>VpaChn25_RS10585</i> | 0.203 | Type I glyceraldehyde-3-phosphate dehydrogenase              |
|                                  | <i>VpaChn25_RS10590</i> | 0.269 | D-hexose-6-phosphate mutarotase                              |
|                                  | <i>VpaChn25_RS10475</i> | 0.306 | Bifunctional acetaldehyde-CoA/alcohol dehydrogenase          |
|                                  | <i>VpaChn25_RS19575</i> | 0.421 | Pyruvate kinase                                              |
|                                  | <i>VpaChn25_RS23575</i> | 0.454 | 6-phospho- $\beta$ -glucosidase                              |
|                                  | <i>VpaChn25_RS01325</i> | 0.492 | Triose-phosphate isomerase                                   |
|                                  | <i>VpaChn25_RS17630</i> | 0.494 | Phosphoenolpyruvate synthase                                 |
|                                  | <i>VpaChn25_RS00605</i> | 2.174 | Phosphoenolpyruvate carboxykinase (ATP)                      |
|                                  | <i>VpaChn25_RS18050</i> | 2.971 | Glyceraldehyde-3-phosphate dehydrogenase                     |
|                                  | <i>VpaChn25_RS08880</i> | 4.278 | Aldehyde dehydrogenase                                       |
| Glycerolipid metabolism          | <i>VpaChn25_RS16340</i> | 2.077 | Glycerate kinase                                             |
|                                  | <i>VpaChn25_RS01910</i> | 2.225 | Dihydroxyacetone kinase ADP-binding subunit DhaL             |
|                                  | <i>VpaChn25_RS01905</i> | 2.231 | Dihydroxyacetone kinase subunit DhaK                         |
|                                  | <i>VpaChn25_RS06325</i> | 2.240 | Triacylglycerol lipase                                       |
|                                  | <i>VpaChn25_RS01900</i> | 3.040 | Glycerol dehydrogenase                                       |
|                                  | <i>VpaChn25_RS17910</i> | 3.844 | Diacylglycerol kinase                                        |
| Sulfur metabolism                | <i>VpaChn25_RS07520</i> | 0.150 | Dimethylsulfoxide reductase subunit B                        |
|                                  | <i>VpaChn25_RS07525</i> | 0.172 | Dimethyl sulfoxide reductase anchor subunit                  |
|                                  | <i>VpaChn25_RS07515</i> | 0.211 | Dimethyl sulfoxide reductase subunit A                       |
|                                  | <i>VpaChn25_RS01595</i> | 0.228 | Adenylyl-sulfate kinase                                      |
|                                  | <i>VpaChn25_RS01585</i> | 0.358 | Sulfate adenylyltransferase subunit CysN                     |
|                                  | <i>VpaChn25_RS07355</i> | 0.497 | Homoserine O-succinyltransferase                             |
|                                  | <i>VpaChn25_RS04200</i> | 0.498 | Cysteine synthase A                                          |
|                                  | <i>VpaChn25_RS13920</i> | 0.499 | Phosphoadenylyl-sulfate reductase                            |
| Mannose and fructose metabolism  | <i>VpaChn25_RS22285</i> | 0.475 | Mannose-6-phosphate isomerase, class I                       |
| Oxidative phosphorylation        | <i>VpaChn25_RS05680</i> | 0.266 | Cytochrome bd-I oxidase subunit CydX                         |
|                                  | <i>VpaChn25_RS20880</i> | 0.308 | Cytochrome o ubiquinol oxidase subunit IV                    |
|                                  | <i>VpaChn25_RS07260</i> | 0.493 | Manganese-dependent inorganic pyrophosphatase                |
|                                  | <i>VpaChn25_RS21575</i> | 2.081 | Cytochrome c oxidase subunit II                              |
|                                  | <i>VpaChn25_RS21560</i> | 2.268 | Cytochrome c oxidase subunit 3                               |
|                                  | <i>VpaChn25_RS21565</i> | 2.276 | Cytochrome c oxidase assembly protein                        |
|                                  | <i>VpaChn25_RS02145</i> | 2.280 | Ubiquinol-cytochrome c reductase iron-sulfur subunit         |
|                                  | <i>VpaChn25_RS04445</i> | 2.456 | Succinate dehydrogenase cytochrome b556 subunit              |
|                                  | <i>VpaChn25_RS04450</i> | 2.464 | Succinate dehydrogenase, hydrophobic membrane anchor protein |
|                                  | <i>VpaChn25_RS02155</i> | 2.911 | Cytochrome c1                                                |
|                                  | <i>VpaChn25_RS21540</i> | 3.411 | COX15/CtaA family protein                                    |
|                                  | <i>VpaChn25_RS02150</i> | 4.053 | Cytochrome bc complex cytochrome subunit                     |
| Histidine metabolism             | <i>VpaChn25_RS04675</i> | 0.436 | Aromatic amino acid ammonia-lyase                            |
|                                  | <i>VpaChn25_RS06765</i> | 3.843 | Histidine ammonia-lyase                                      |
|                                  | <i>VpaChn25_RS06780</i> | 4.142 | Imidazolonepropionase                                        |
|                                  | <i>VpaChn25_RS06770</i> | 4.374 | Urocanate hydratase                                          |
|                                  | <i>VpaChn25_RS06775</i> | 4.716 | Formimidoylglutamase                                         |
| Nitrogen metabolism              | <i>VpaChn25_RS02355</i> | 0.096 | Glutamate synthase subunit $\beta$                           |
|                                  | <i>VpaChn25_RS02360</i> | 0.112 | Glutamate synthase large subunit                             |
|                                  | <i>VpaChn25_RS20680</i> | 0.231 | ABC transporter ATP-binding protein                          |
|                                  | <i>VpaChn25_RS16925</i> | 0.362 | Carbonic anhydrase family protein                            |
|                                  | <i>VpaChn25_RS02345</i> | 0.473 | FAD-dependent oxidoreductase                                 |
|                                  | <i>VpaChn25_RS22655</i> | 0.481 | Carbonic anhydrase                                           |
|                                  | <i>VpaChn25_RS09500</i> | 3.477 | Ammonia-forming nitrite reductase cytochrome c552 subunit    |
| Amino sugar and nucleotide sugar | <i>VpaChn25_RS21110</i> | 0.001 | UDP-glucose 4-epimerase GalE                                 |

|                                    |                         |       |                                                                              |
|------------------------------------|-------------------------|-------|------------------------------------------------------------------------------|
| metabolism                         | <i>VpaChn25_RS21105</i> | 0.001 | UDP-glucose-hexose-1-phosphate uridylyltransferase                           |
|                                    | <i>VpaChn25_RS21100</i> | 0.001 | Galactokinase                                                                |
|                                    | <i>VpaChn25_RS23815</i> | 0.164 | N-acetylmuramic acid 6-phosphate etherase                                    |
|                                    | <i>VpaChn25_RS07740</i> | 2.008 | N-acetylglucosamine kinase                                                   |
|                                    | <i>VpaChn25_RS10005</i> | 2.279 | NAD-dependent epimerase                                                      |
|                                    | <i>VpaChn25_RS12610</i> | 3.364 | N, N'-diacetylchitobiose phosphorylase                                       |
|                                    | <i>VpaChn25_RS12600</i> | 3.554 | N-acetylglucosamine kinase                                                   |
|                                    | <i>VpaChn25_RS12605</i> | 5.481 | Family 20 glycosylhydrolase                                                  |
| Nitrotoluene degradation           | <i>VpaChn25_RS21015</i> | 0.009 | Alkene reductase                                                             |
|                                    | <i>VpaChn25_RS21020</i> | 0.021 | Alkene reductase                                                             |
|                                    | <i>VpaChn25_RS23085</i> | 0.274 | Oxygen-insensitive NAD(P)H nitroreductase                                    |
| Taurine and hypotaurine metabolism | <i>VpaChn25_RS15390</i> | 2.136 | $\gamma$ -glutamyltransferase                                                |
| Propanoate metabolism              | <i>VpaChn25_RS21225</i> | 0.216 | Acetate/propionate family kinase                                             |
|                                    | <i>VpaChn25_RS10295</i> | 0.418 | Phosphate acetyltransferase                                                  |
|                                    | <i>VpaChn25_RS20810</i> | 2.677 | Pyruvate dehydrogenase (acetyl-transferring) E1 component subunit $\alpha$   |
|                                    | <i>VpaChn25_RS20820</i> | 2.715 | 2-oxo acid dehydrogenase subunit E2                                          |
|                                    | <i>VpaChn25_RS20815</i> | 3.263 | $\alpha$ -ketoacid dehydrogenase subunit $\beta$                             |
| Pyruvate metabolism                | <i>VpaChn25_RS05195</i> | 0.162 | Formate C-acetyltransferase                                                  |
|                                    | <i>VpaChn25_RS14110</i> | 0.342 | Phosphoenolpyruvate carboxylase                                              |
|                                    | <i>VpaChn25_RS19425</i> | 0.377 | Acetyl-CoA carboxylase, carboxyltransferase subunit $\beta$                  |
|                                    | <i>VpaChn25_RS12745</i> | 0.379 | Pyruvate dehydrogenase complex dihydrolipoyllysine-residue acetyltransferase |
|                                    | <i>VpaChn25_RS18565</i> | 0.421 | Thiolase family protein                                                      |
| Longevity regulating pathway       | <i>VpaChn25_RS14590</i> | 0.155 | Chaperonin GroEL                                                             |
|                                    | <i>VpaChn25_RS03265</i> | 0.269 | Molecular chaperone DnaK                                                     |
|                                    | <i>VpaChn25_RS17350</i> | 0.433 | Catalase                                                                     |
|                                    | <i>VpaChn25_RS17235</i> | 0.455 | Chaperonin GroEL                                                             |

**Table S4.** Major changed metabolic pathways in the  $\Delta VpaChn25\_0714$  mutant.

| Metabolism Pathway              | Gene ID                 | Fold Change | Gene Description                                         |
|---------------------------------|-------------------------|-------------|----------------------------------------------------------|
| Propanoate metabolism           | <i>VpaChn25_RS21225</i> | 0.233       | Acetate/propionate family kinase                         |
|                                 | <i>VpaChn25_RS07255</i> | 0.312       | 4-aminobutyrate-2-oxoglutarate transaminase              |
|                                 | <i>VpaChn25_RS18570</i> | 0.373       | CoA-acylating methylmalonate-semialdehyde dehydrogenase  |
|                                 | <i>VpaChn25_RS10295</i> | 0.433       | Phosphate acetyltransferase                              |
|                                 | <i>VpaChn25_RS19605</i> | 0.435       | Iron-containing alcohol dehydrogenase                    |
|                                 | <i>VpaChn25_RS04475</i> | 2.019       | ADP-forming succinate-CoA ligase subunit $\beta$         |
| Mannose and fructose metabolism | <i>VpaChn25_RS19525</i> | 0.080       | 1-phosphofructokinase                                    |
|                                 | <i>VpaChn25_RS21725</i> | 0.426       | Zinc-binding dehydrogenase                               |
|                                 | <i>VpaChn25_RS20215</i> | 3.217       | Mannose-6-phosphate isomerase, class I                   |
| Nitrotoluene degradation        | <i>VpaChn25_RS17690</i> | 0.325       | Alkene reductase                                         |
|                                 | <i>VpaChn25_RS18635</i> | 0.374       | NAD(P)H-dependent oxidoreductase                         |
|                                 | <i>VpaChn25_RS23085</i> | 0.416       | Oxygen-insensitive NAD(P)H nitroreductase                |
|                                 | <i>VpaChn25_RS19315</i> | 0.439       | Alkene reductase                                         |
| Phosphotransferase system (PTS) | <i>VpaChn25_RS19520</i> | 0.047       | PTS fructose transporter subunit IIBC                    |
|                                 | <i>VpaChn25_RS19530</i> | 0.134       | Fused PTS fructose transporter subunit IIA / HPr protein |
|                                 | <i>VpaChn25_RS17315</i> | 0.187       | PTS sugar transporter subunit IIA                        |
|                                 | <i>VpaChn25_RS21730</i> | 0.265       | PTS mannitol transporter subunit IICB                    |
|                                 | <i>VpaChn25_RS16970</i> | 0.343       | PTS sugar transporter subunit IIB                        |
|                                 | <i>VpaChn25_RS16965</i> | 0.351       | PTS ascorbate transporter subunit IIC                    |
|                                 | <i>VpaChn25_RS21735</i> | 0.357       | PTS sugar transporter subunit IIA                        |

|                                   |                         |       |                                                                   |
|-----------------------------------|-------------------------|-------|-------------------------------------------------------------------|
|                                   | <i>VpaChn25_RS23820</i> | 0.496 | PTS N-acetylmuramic acid transporter subunit IIBC                 |
|                                   | <i>VpaChn25_RS23450</i> | 2.823 | Glucose-specific PTS transporter subunit IIBC                     |
| Lysine degradation                | <i>VpaChn25_RS14795</i> | 0.052 | Lysine decarboxylase CadA                                         |
|                                   | <i>VpaChn25_RS07250</i> | 0.205 | NAD-dependent succinate-semialdehyde Dehydrogenase                |
| Glycolysis/Gluconeogenesis        | <i>VpaChn25_RS10590</i> | 0.228 | D-hexose-6-phosphate mutarotase                                   |
|                                   | <i>VpaChn25_RS23575</i> | 0.237 | 6-phospho- $\beta$ -glucosidase                                   |
|                                   | <i>VpaChn25_RS10585</i> | 0.285 | Type I glyceraldehyde-3-phosphate dehydrogenase                   |
|                                   | <i>VpaChn25_RS10475</i> | 0.396 | Bifunctional acetaldehyde-CoA/alcohol dehydrogenase               |
|                                   | <i>VpaChn25_RS19575</i> | 0.406 | Pyruvate kinase                                                   |
|                                   | <i>VpaChn25_RS01325</i> | 0.483 | Triose-phosphate isomerase                                        |
|                                   | <i>VpaChn25_RS00605</i> | 2.022 | Phosphoenolpyruvate carboxykinase (ATP)                           |
|                                   | <i>VpaChn25_RS08880</i> | 2.211 | Aldehyde dehydrogenase                                            |
| Benzoate degradation              | <i>VpaChn25_RS18050</i> | 2.964 | Glyceraldehyde-3-phosphate dehydrogenase                          |
|                                   | <i>VpaChn25_RS18485</i> | 0.463 | Carboxymuconolactone decarboxylase family protein                 |
| Pyruvate metabolism               | <i>VpaChn25_RS19425</i> | 0.166 | Acetyl-CoA carboxylase, carboxyltransferase subunit $\beta$       |
|                                   | <i>VpaChn25_RS05195</i> | 0.172 | Formate C-acetyltransferase                                       |
|                                   | <i>VpaChn25_RS19320</i> | 0.298 | Lactoylglutathione lyase                                          |
|                                   | <i>VpaChn25_RS01820</i> | 0.405 | 2-isopropylmalate synthase                                        |
|                                   | <i>VpaChn25_RS14110</i> | 0.490 | Phosphoenolpyruvate carboxylase                                   |
|                                   | <i>VpaChn25_RS18565</i> | 0.494 | Thiolase family protein                                           |
|                                   | <i>VpaChn25_RS08505</i> | 2.146 | Acylphosphatase                                                   |
|                                   | <i>VpaChn25_RS14715</i> | 2.204 | Acetate-CoA ligase                                                |
| Ascorbate and aldarate metabolism | <i>VpaChn25_RS07015</i> | 0.151 | Aldehyde dehydrogenase (NADP <sup>+</sup> )                       |
|                                   | <i>VpaChn25_RS10005</i> | 2.710 | NAD-dependent epimerase                                           |
| Butanoate metabolism              | <i>VpaChn25_RS17675</i> | 0.268 | SDR family oxidoreductase                                         |
|                                   | <i>VpaChn25_RS15645</i> | 0.445 | Acetolactate synthase 2 catalytic subunit                         |
|                                   | <i>VpaChn25_RS18170</i> | 2.017 | SDR family oxidoreductase                                         |
| Fatty acid degradation            | <i>VpaChn25_RS18430</i> | 0.470 | Long-chain fatty acid-CoA ligase                                  |
|                                   | <i>VpaChn25_RS10820</i> | 2.100 | Fatty acid oxidation complex subunit $\alpha$ FadJ                |
|                                   | <i>VpaChn25_RS10825</i> | 2.324 | Acetyl-CoA C-acyltransferase FadI                                 |
|                                   | <i>VpaChn25_RS18175</i> | 2.425 | Acetyl-CoA C-acetyltransferase                                    |
| Histidine metabolism              | <i>VpaChn25_RS04675</i> | 0.307 | Aromatic amino acid ammonia-lyase                                 |
|                                   | <i>VpaChn25_RS06765</i> | 3.400 | Histidine ammonia-lyase                                           |
|                                   | <i>VpaChn25_RS06780</i> | 3.435 | Imidazolonepropionase                                             |
|                                   | <i>VpaChn25_RS06770</i> | 4.504 | Urocanate hydratase                                               |
|                                   | <i>VpaChn25_RS06775</i> | 4.629 | Formimidoylglutamate                                              |
| $\beta$ -lactam resistance        | <i>VpaChn25_RS07075</i> | 0.119 | ATP-binding cassette domain-containing protein                    |
|                                   | <i>VpaChn25_RS07085</i> | 0.214 | ABC transporter permease subunit                                  |
|                                   | <i>VpaChn25_RS07090</i> | 0.306 | Oligopeptide ABC transporter permease OppB                        |
|                                   | <i>VpaChn25_RS12510</i> | 0.357 | Porin                                                             |
|                                   | <i>VpaChn25_RS07080</i> | 0.417 | ATP-binding cassette domain-containing protein                    |
|                                   | <i>VpaChn25_RS07095</i> | 0.426 | Peptide ABC transporter substrate-binding protein                 |
|                                   | <i>VpaChn25_RS21835</i> | 0.432 | Carbenicillin-hydrolyzing class A $\beta$ -lactamase CARB-18      |
|                                   | <i>VpaChn25_RS18245</i> | 0.462 | Multidrug efflux RND transporter periplasmic adaptor subunit VmeY |

**Table S5.** Major changed metabolic pathways in the  $\Delta VpaChn25\_RS25055$  mutant.

| Metabolism Pathway | Gene ID                 | Fold Change | Gene Description                               |
|--------------------|-------------------------|-------------|------------------------------------------------|
| Sulfur metabolism  | <i>VpaChn25_RS07520</i> | 0.298       | Dimethylsulfoxide reductase subunit B          |
|                    | <i>VpaChn25_RS07525</i> | 0.319       | Dimethyl sulfoxide reductase anchor subunit    |
|                    | <i>VpaChn25_RS07515</i> | 0.343       | Dimethyl sulfoxide reductase subunit A         |
|                    | <i>VpaChn25_RS04975</i> | 0.396       | PLP-dependent cysteine synthase family protein |
|                    | <i>VpaChn25_RS06515</i> | 0.487       | C-type cytochrome                              |
|                    | <i>VpaChn25_RS09955</i> | 2.050       | Polysulfide reductase NrfD                     |
|                    | <i>VpaChn25_RS01585</i> | 2.714       | Sulfate adenyltransferase subunit CysN         |

|                                         |                         |       |                                                           |
|-----------------------------------------|-------------------------|-------|-----------------------------------------------------------|
| Glyoxylate and dicarboxylate metabolism | <i>VpaChn25_RS01580</i> | 3.078 | Sulfate adenylyltransferase subunit CysD                  |
|                                         | <i>VpaChn25_RS17350</i> | 0.436 | Catalase                                                  |
|                                         | <i>VpaChn25_RS21805</i> | 2.591 | Formate dehydrogenase subunit $\alpha$                    |
|                                         | <i>VpaChn25_RS07825</i> | 3.661 | Formate dehydrogenase FDH3 subunit $\beta$                |
|                                         | <i>VpaChn25_RS07820</i> | 3.982 | Formate dehydrogenase subunit $\alpha$                    |
| Arginine biosynthesis                   | <i>VpaChn25_RS07830</i> | 4.105 | Formate dehydrogenase subunit $\gamma$                    |
|                                         | <i>VpaChn25_RS00565</i> | 6.026 | Glutamate-ammonia ligase                                  |
|                                         | <i>VpaChn25_RS11620</i> | 0.084 | Amino-acid N-acetyltransferase                            |
|                                         | <i>VpaChn25_RS14100</i> | 0.100 | N-acetyl- $\gamma$ -glutamyl-phosphate reductase          |
|                                         | <i>VpaChn25_RS14095</i> | 0.107 | Acetylglutamate kinase                                    |
| Longevity regulating pathway            | <i>VpaChn25_RS13555</i> | 0.302 | Ornithine carbamoyltransferase                            |
|                                         | <i>VpaChn25_RS14090</i> | 0.305 | Argininosuccinate synthase                                |
|                                         | <i>VpaChn25_RS14590</i> | 0.290 | Chaperonin GroEL                                          |
|                                         | <i>VpaChn25_RS17235</i> | 0.313 | Chaperonin GroEL                                          |
|                                         | <i>VpaChn25_RS03265</i> | 0.373 | Molecular chaperone DnaK                                  |
| Glycolysis/Gluconeogenesis              | <i>VpaChn25_RS20830</i> | 0.472 | Glutathione S-transferase family protein                  |
|                                         | <i>VpaChn25_RS10590</i> | 0.215 | D-hexose-6-phosphate mutarotase                           |
|                                         | <i>VpaChn25_RS10585</i> | 0.363 | Type I glyceraldehyde-3-phosphate dehydrogenase           |
|                                         | <i>VpaChn25_RS08880</i> | 0.368 | Aldehyde dehydrogenase                                    |
|                                         | <i>VpaChn25_RS21435</i> | 0.420 | L-threonine dehydrogenase                                 |
| NOD-like receptor signaling pathway     | <i>VpaChn25_RS23575</i> | 0.426 | 6-phospho- $\beta$ -glucosidase                           |
|                                         | <i>VpaChn25_RS10475</i> | 0.449 | Bifunctional acetaldehyde-CoA/alcohol dehydrogenase       |
|                                         | <i>VpaChn25_RS18050</i> | 2.379 | Glyceraldehyde-3-phosphate dehydrogenase                  |
|                                         | <i>VpaChn25_RS01350</i> | 2.553 | Class II fructose-bisphosphatase                          |
|                                         | <i>VpaChn25_RS04175</i> | 0.317 | Flagellin                                                 |
| Ribosome                                | <i>VpaChn25_RS04340</i> | 0.389 | Molecular chaperone HtpG                                  |
|                                         | <i>VpaChn25_RS11070</i> | 0.396 | Flagellin                                                 |
|                                         | <i>VpaChn25_RS11075</i> | 0.451 | Flagellin                                                 |
|                                         | <i>VpaChn25_RS01405</i> | 2.006 | 50S ribosomal protein L3                                  |
|                                         | <i>VpaChn25_RS01475</i> | 2.016 | 30S ribosomal protein S8                                  |
| Monobactam biosynthesis                 | <i>VpaChn25_RS14000</i> | 2.028 | 30S ribosomal protein S18                                 |
|                                         | <i>VpaChn25_RS01415</i> | 2.052 | 50S ribosomal protein L23                                 |
|                                         | <i>VpaChn25_RS01520</i> | 2.054 | 30S ribosomal protein S11                                 |
|                                         | <i>VpaChn25_RS01465</i> | 2.094 | 50S ribosomal protein L5                                  |
|                                         | <i>VpaChn25_RS01735</i> | 2.100 | 50S ribosomal protein L21                                 |
|                                         | <i>VpaChn25_RS02135</i> | 2.191 | 50S ribosomal protein L13                                 |
|                                         | <i>VpaChn25_RS01450</i> | 2.206 | 30S ribosomal protein S17                                 |
|                                         | <i>VpaChn25_RS14165</i> | 2.253 | 30S ribosomal protein S7                                  |
|                                         | <i>VpaChn25_RS01460</i> | 2.357 | 50S ribosomal protein L24                                 |
|                                         | <i>VpaChn25_RS02140</i> | 2.478 | 30S ribosomal protein S9                                  |
|                                         | <i>VpaChn25_RS01740</i> | 2.705 | 50S ribosomal protein L27                                 |
|                                         | <i>VpaChn25_RS02405</i> | 0.288 | Bifunctional a spartate kinase/homoserine dehydrogenase I |
|                                         | <i>VpaChn25_RS13865</i> | 2.289 | Lysine-sensitive a spartokinase 3                         |

**Table S6.** Major changed metabolic pathways in the  $\Delta VpaChn25\_RS25055-0713-0714$  mutant.

| Metabolism Pathway              | Gene ID                 | Fold Change | Gene Description                       |
|---------------------------------|-------------------------|-------------|----------------------------------------|
| Mannose and fructose metabolism | <i>VpaChn25_RS19525</i> | 0.095       | 1-phosphofructokinase                  |
|                                 | <i>VpaChn25_RS22285</i> | 0.456       | Mannose-6-phosphate isomerase, class I |
|                                 | <i>VpaChn25_RS01930</i> | 0.499       | Mannitol-1-phosphate 5-dehydrogenase   |
| Propanoate metabolism           | <i>VpaChn25_RS05195</i> | 0.055       | Formate C-acetyltransferase            |
|                                 | <i>VpaChn25_RS21225</i> | 0.170       | Acetate/propionate family kinase       |
|                                 | <i>VpaChn25_RS10295</i> | 0.234       | Phosphate acetyltransferase            |
|                                 | <i>VpaChn25_RS10290</i> | 0.457       | Acetate kinase                         |



|                                             |                         |       |                                                                                          |
|---------------------------------------------|-------------------------|-------|------------------------------------------------------------------------------------------|
|                                             | <i>VpaChn25_RS04475</i> | 2.407 | ADP-forming succinate-CoA ligase subunit $\beta$                                         |
|                                             | <i>VpaChn25_RS20820</i> | 2.637 | 2-oxo acid dehydrogenase subunit E2                                                      |
|                                             | <i>VpaChn25_RS20810</i> | 2.744 | Pyruvate dehydrogenase (acetyl-transferring) E1 component subunit $\alpha$               |
|                                             | <i>VpaChn25_RS20815</i> | 3.264 | $\alpha$ -ketoacid dehydrogenase subunit $\beta$                                         |
| Alanine, aspartate and glutamate metabolism | <i>VpaChn25_RS02355</i> | 0.098 | Glutamate synthase subunit $\beta$                                                       |
|                                             | <i>VpaChn25_RS02360</i> | 0.100 | Glutamate synthase large subunit                                                         |
|                                             | <i>VpaChn25_RS16990</i> | 0.160 | Aspartate aminotransferase family protein                                                |
|                                             | <i>VpaChn25_RS01880</i> | 0.237 | Glutamine-fructose-6-phosphate transaminase (isomerizing)                                |
|                                             | <i>VpaChn25_RS13400</i> | 0.476 | NAD-dependent succinate-semialdehyde dehydrogenase                                       |
|                                             | <i>VpaChn25_RS04365</i> | 0.480 | Asparagine synthase B                                                                    |
|                                             | <i>VpaChn25_RS13565</i> | 2.013 | Aspartate carbamoyltransferase regulatory subunit                                        |
|                                             | <i>VpaChn25_RS02295</i> | 2.104 | Carbamoyl-phosphate synthase large subunit                                               |
|                                             | <i>VpaChn25_RS02290</i> | 2.208 | Glutamine-hydrolyzing carbamoyl-phosphate synthase small subunit                         |
|                                             | <i>VpaChn25_RS17645</i> | 2.878 | Adenylosuccinate synthase                                                                |
| NOD-like receptor signaling pathway         | <i>VpaChn25_RS11075</i> | 0.331 | Flagellin                                                                                |
|                                             | <i>VpaChn25_RS11070</i> | 0.340 | Flagellin                                                                                |
|                                             | <i>VpaChn25_RS04170</i> | 0.417 | Flagellin                                                                                |
|                                             | <i>VpaChn25_RS04340</i> | 0.419 | Molecular chaperone HtpG                                                                 |
|                                             | <i>VpaChn25_RS11085</i> | 0.419 | Flagellin                                                                                |
|                                             | <i>VpaChn25_RS04175</i> | 0.425 | Flagellin                                                                                |
| PTS                                         | <i>VpaChn25_RS19520</i> | 0.056 | PTS fructose transporter subunit IIBC                                                    |
|                                             | <i>VpaChn25_RS19530</i> | 0.122 | Fused PTS fructose transporter subunit IIA/HPr protein                                   |
|                                             | <i>VpaChn25_RS22280</i> | 0.162 | Fructose-specific PTS transporter subunit EIIC                                           |
|                                             | <i>VpaChn25_RS17315</i> | 0.192 | PTS sugar transporter subunit IIA                                                        |
|                                             | <i>VpaChn25_RS21735</i> | 0.346 | PTS sugar transporter subunit IIA                                                        |
|                                             | <i>VpaChn25_RS21730</i> | 0.374 | PTS mannitol transporter subunit IICB                                                    |
|                                             | <i>VpaChn25_RS01935</i> | 0.392 | PTS mannitol transporter subunit IICBA                                                   |
|                                             | <i>VpaChn25_RS04195</i> | 0.405 | HPr family phosphocarrier protein                                                        |
|                                             | <i>VpaChn25_RS23450</i> | 2.104 | Glucose-specific PTS transporter subunit IIBC                                            |
|                                             | <i>VpaChn25_RS13475</i> | 2.207 | PTS sugar transporter subunit IIB                                                        |
|                                             | <i>VpaChn25_RS13470</i> | 2.814 | PTS sugar transporter subunit IIC                                                        |
| Amino sugar and nucleotide sugar metabolism | <i>VpaChn25_RS11760</i> | 0.427 | UDP-glucose 4-epimerase GalE                                                             |
|                                             | <i>VpaChn25_RS11755</i> | 0.435 | UDP-glucose-hexose-1-phosphate uridylyltransferase                                       |
|                                             | <i>VpaChn25_RS12480</i> | 0.441 | Phosphoglucosamine mutase                                                                |
|                                             | <i>VpaChn25_RS21110</i> | 0.452 | UDP-glucose 4-epimerase GalE                                                             |
|                                             | <i>VpaChn25_RS21100</i> | 0.472 | Galactokinase                                                                            |
|                                             | <i>VpaChn25_RS21105</i> | 0.498 | UDP-glucose-hexose-1-phosphate uridylyltransferase                                       |
|                                             | <i>VpaChn25_RS11455</i> | 2.100 | Ig-like domain-containing protein                                                        |
|                                             | <i>VpaChn25_RS10005</i> | 2.435 | NAD-dependent epimerase                                                                  |
|                                             | <i>VpaChn25_RS12610</i> | 3.486 | N, N'-diacetylchitobiose phosphorylase                                                   |
|                                             | <i>VpaChn25_RS12600</i> | 5.279 | N-acetylglucosamine kinase                                                               |
|                                             | <i>VpaChn25_RS12605</i> | 5.692 | Family 20 glycosylhydrolase                                                              |
| Arginine and proline metabolism             | <i>VpaChn25_RS07035</i> | 0.189 | Ornithine cyclodeaminase family protein                                                  |
|                                             | <i>VpaChn25_RS23295</i> | 0.310 | Ornithine decarboxylase SpeF                                                             |
|                                             | <i>VpaChn25_RS07215</i> | 0.393 | Glutamine synthetase family protein                                                      |
|                                             | <i>VpaChn25_RS16685</i> | 2.105 | Arginine decarboxylase                                                                   |
|                                             | <i>VpaChn25_RS09600</i> | 2.229 | Carboxynorspermidine decarboxylase                                                       |
|                                             | <i>VpaChn25_RS14270</i> | 2.285 | Succinylglutamate-semialdehyde dehydrogenase                                             |
|                                             | <i>VpaChn25_RS14275</i> | 2.301 | Arginine N-succinyltransferase                                                           |
|                                             | <i>VpaChn25_RS09605</i> | 2.957 | Saccharopine dehydrogenase family protein                                                |
|                                             | <i>VpaChn25_RS23720</i> | 3.110 | Bifunctional proline dehydrogenase/L-glutamate $\gamma$ -semialdehyde dehydrogenase PutA |
| Oxidative phosphorylation                   | <i>VpaChn25_RS02155</i> | 2.218 | Cytochrome c1                                                                            |

|                            |                         |       |                                                                    |
|----------------------------|-------------------------|-------|--------------------------------------------------------------------|
|                            | <i>VpaChn25_RS20880</i> | 2.544 | Cytochrome o ubiquinol oxidase subunit IV                          |
|                            | <i>VpaChn25_RS07945</i> | 2.564 | CcoQ/FixQ family Cbb3-type cytochrome c oxidase assembly chaperone |
|                            | <i>VpaChn25_RS20890</i> | 2.569 | Cytochrome o ubiquinol oxidase subunit I                           |
|                            | <i>VpaChn25_RS21570</i> | 2.638 | Cytochrome c oxidase subunit I                                     |
|                            | <i>VpaChn25_RS21575</i> | 2.724 | Cytochrome c oxidase subunit II                                    |
|                            | <i>VpaChn25_RS02150</i> | 2.740 | Cytochrome bc complex cytochrome b subunit                         |
|                            | <i>VpaChn25_RS21535</i> | 2.849 | Heme o synthase                                                    |
|                            | <i>VpaChn25_RS21560</i> | 2.981 | Cytochrome c oxidase subunit 3                                     |
|                            | <i>VpaChn25_RS21540</i> | 3.028 | COX15/CtaA family protein                                          |
|                            | <i>VpaChn25_RS20875</i> | 3.328 | Heme o synthase                                                    |
|                            | <i>VpaChn25_RS20885</i> | 4.543 | Cytochrome o ubiquinol oxidase subunit III                         |
|                            | <i>VpaChn25_RS21565</i> | 5.684 | Cytochrome c oxidase assembly protein                              |
| Glycolysis/Gluconeogenesis | <i>VpaChn25_RS10590</i> | 0.166 | D-hexose-6-phosphate mutarotase                                    |
|                            | <i>VpaChn25_RS10585</i> | 0.186 | Type I glyceraldehyde-3-phosphate dehydrogenase                    |
|                            | <i>VpaChn25_RS23575</i> | 0.228 | 6-phospho- $\beta$ -glucosidase                                    |
|                            | <i>VpaChn25_RS10475</i> | 0.286 | Bifunctional acetaldehyde-CoA/alcohol dehydrogenase                |
|                            | <i>VpaChn25_RS14485</i> | 0.382 | 2, 3-bisphosphoglycerate-independent phosphoglycerate mutase       |
|                            | <i>VpaChn25_RS01325</i> | 0.457 | Triose-phosphate isomerase                                         |
|                            | <i>VpaChn25_RS19575</i> | 0.467 | Pyruvate kinase                                                    |
|                            | <i>VpaChn25_RS18050</i> | 4.409 | Glyceraldehyde-3-phosphate dehydrogenase                           |
|                            | <i>VpaChn25_RS08880</i> | 7.179 | Aldehyde dehydrogenase                                             |
| Thiamine metabolism        | <i>VpaChn25_RS15440</i> | 2.127 | 2-iminoacetate synthase ThiH                                       |
|                            | <i>VpaChn25_RS16405</i> | 2.192 | Thiamine phosphate synthase                                        |
|                            | <i>VpaChn25_RS15445</i> | 2.476 | Thiazole synthase                                                  |
|                            | <i>VpaChn25_RS16410</i> | 2.520 | Hydroxyethylthiazole kinase                                        |
|                            | <i>VpaChn25_RS15455</i> | 2.602 | Thiazole biosynthesis adenyltransferase ThiF                       |
|                            | <i>VpaChn25_RS15460</i> | 2.623 | Thiamine phosphate synthase                                        |
|                            | <i>VpaChn25_RS16415</i> | 3.115 | Thiaminase II                                                      |
| Arginine biosynthesis      | <i>VpaChn25_RS11620</i> | 0.101 | Amino-acid N-acetyltransferase                                     |
|                            | <i>VpaChn25_RS14100</i> | 0.158 | N-acetyl- $\gamma$ -glutamyl-phosphate reductase                   |
|                            | <i>VpaChn25_RS14095</i> | 0.204 | Acetylglutamate kinase                                             |
|                            | <i>VpaChn25_RS14090</i> | 0.329 | Argininosuccinate synthase                                         |
|                            | <i>VpaChn25_RS13555</i> | 0.340 | Ornithine carbamoyltransferase                                     |
|                            | <i>VpaChn25_RS14085</i> | 0.376 | Argininosuccinate lyase                                            |

---
